# Supplementary material for: Asymmetric oxidation of vinyl- and ethynyl terthiophene ligands in triruthenium complexes
Source: Royal Society of Chemistry journal article supplement (doi:10.1039/c5dt04083c), 2015-11-25
Supplement: c5dt04083c1.pdf [file c5dt04083c1.pdf]

**Asymmetric Oxidation of Bridging Vinyl- and Ethynyl  
Terthiophene Ligands in Trinuclear Ruthenium Complexes**

Jing Zhang,<sup>a</sup> Chao-Fang Sun,<sup>a</sup> Ming-Xing Zhang,<sup>a</sup> František Hartl,<sup>\*,b</sup> Jun Yin,<sup>a</sup>

Guang-Ao Yu,<sup>a</sup> Li Rao,<sup>a</sup> Sheng Hua Liu<sup>\*,a</sup>

*<sup>a</sup>Key Laboratory of Pesticide and Chemical Biology, Ministry of Education, College of Chemistry, Central China Normal University, Wuhan 430079, P.R. China*

*<sup>b</sup>Department of Chemistry, University of Reading, Whiteknights, Reading RG6 6AD, U.K.*

## Electrochemistry

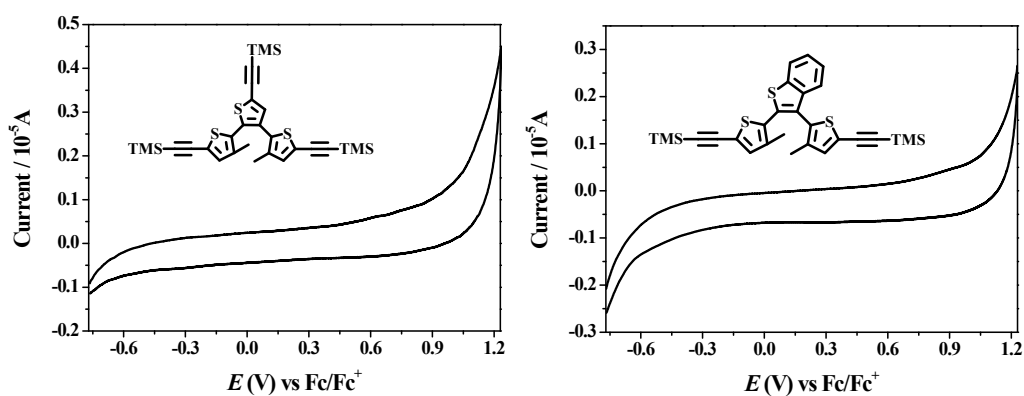

**Figure S1.** Cyclic voltammograms (CV) of the TMS-protected bridging ligand precursors in  $\text{CH}_2\text{Cl}_2/n\text{-Bu}_4\text{NPF}_6$  at  $10^{-1} \text{ V s}^{-1}$ .

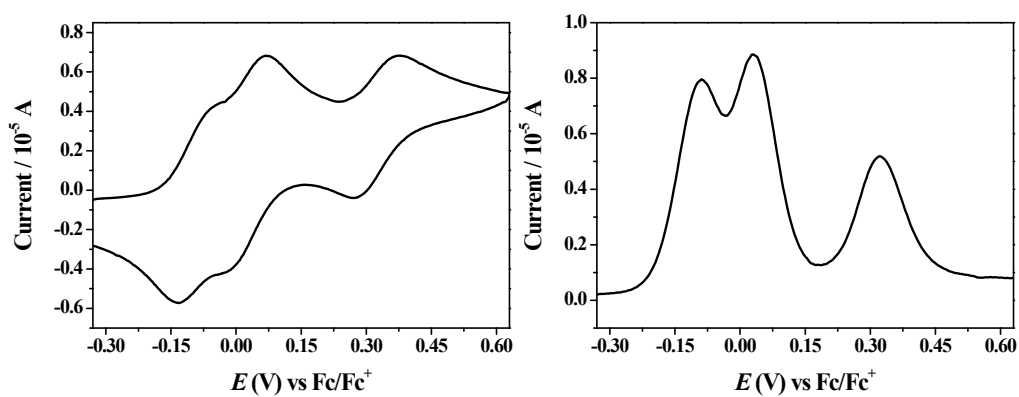

**Figure S2.** Left: cyclic voltammogram (CV) of complex **1d** in  $\text{CH}_2\text{Cl}_2/n\text{-Bu}_4\text{N}[\text{B}(\text{C}_6\text{F}_5)_4]$  at  $10^{-1} \text{ V s}^{-1}$ . Right: square-wave voltammogram (SWV) of complex **1d**,  $f = 10 \text{ Hz}$  ( $t_p = 25 \text{ mV}$ ).

## UV-Vis-NIR and IR Spectroelectrochemistry

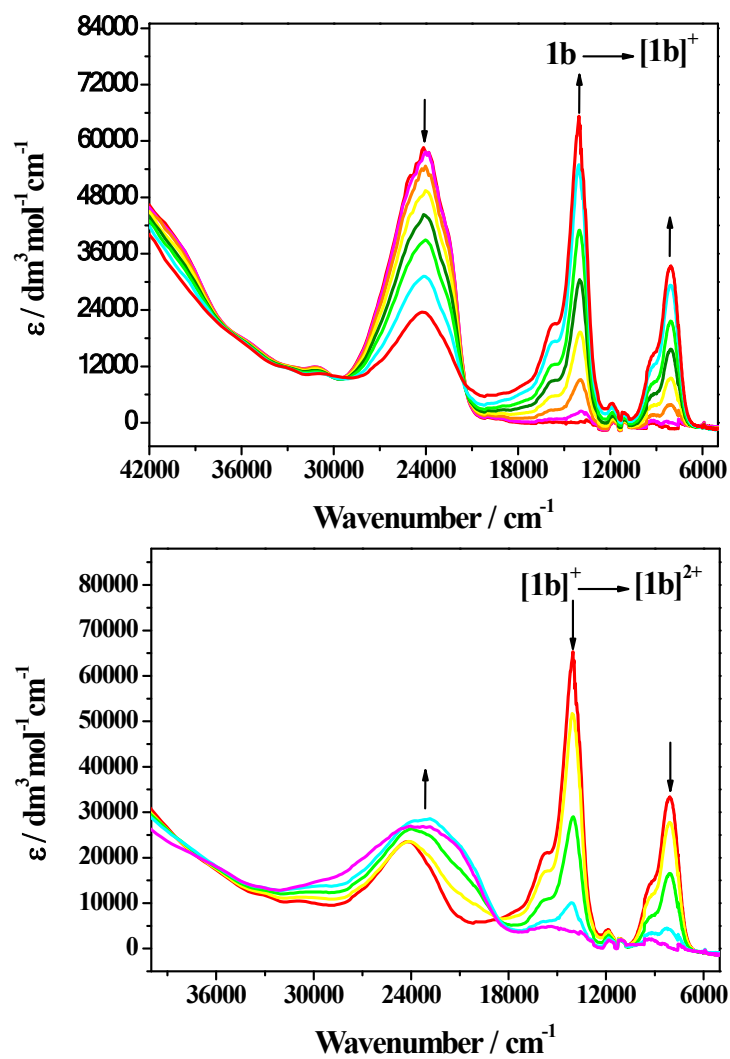

**Figure S3.** UV-vis-NIR spectral changes recorded during the successive oxidation of **1b** to  $[1\mathbf{b}]^+$  (top) and  $[1\mathbf{b}]^{2+}$  (bottom) in  $\text{CH}_2\text{Cl}_2/10^{-1} \text{ M } n\text{-Bu}_4\text{NPF}_6$  at 298 K within an OTTLE cell.

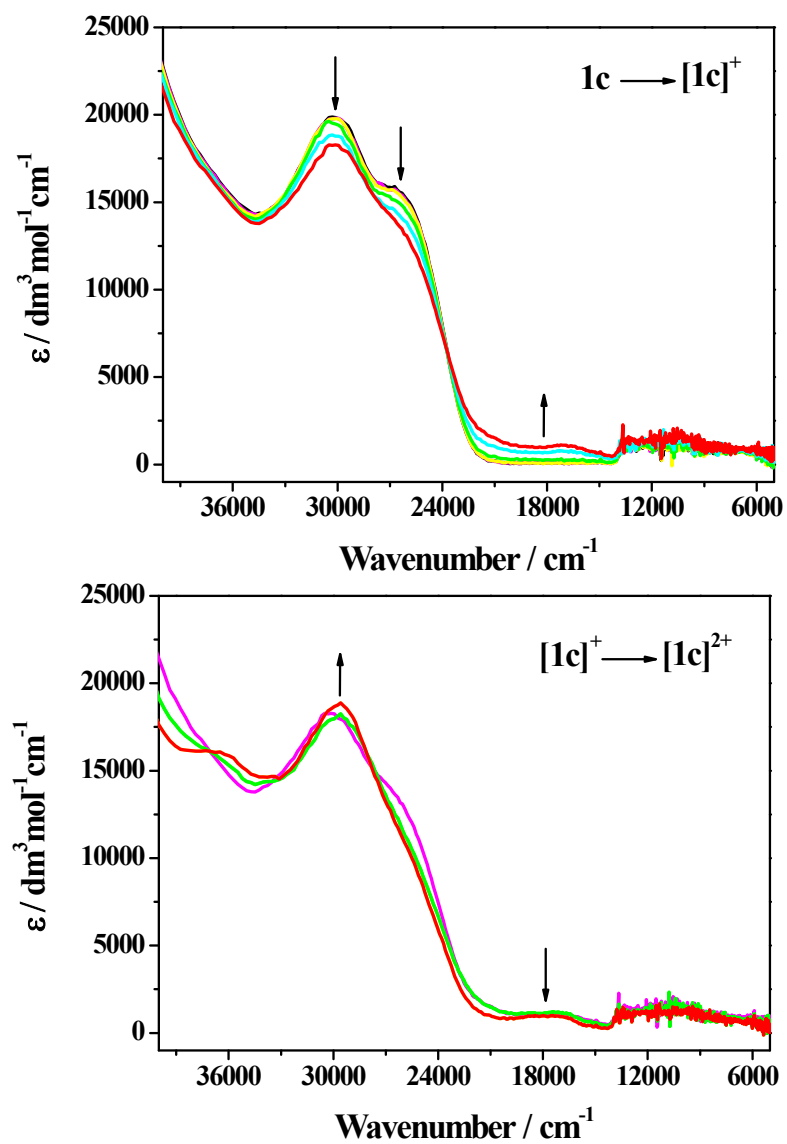

**Figure S4.** UV-vis-NIR spectral changes recorded during the successive oxidation of  $1\mathbf{c}$  to  $[\mathbf{1c}]^+$  (top) and  $[\mathbf{1c}]^{2+}$  (bottom) in  $\text{CH}_2\text{Cl}_2/10^{-1} \text{ M } n\text{-Bu}_4\text{NPF}_6$  at 298 K within an OTTLE cell.

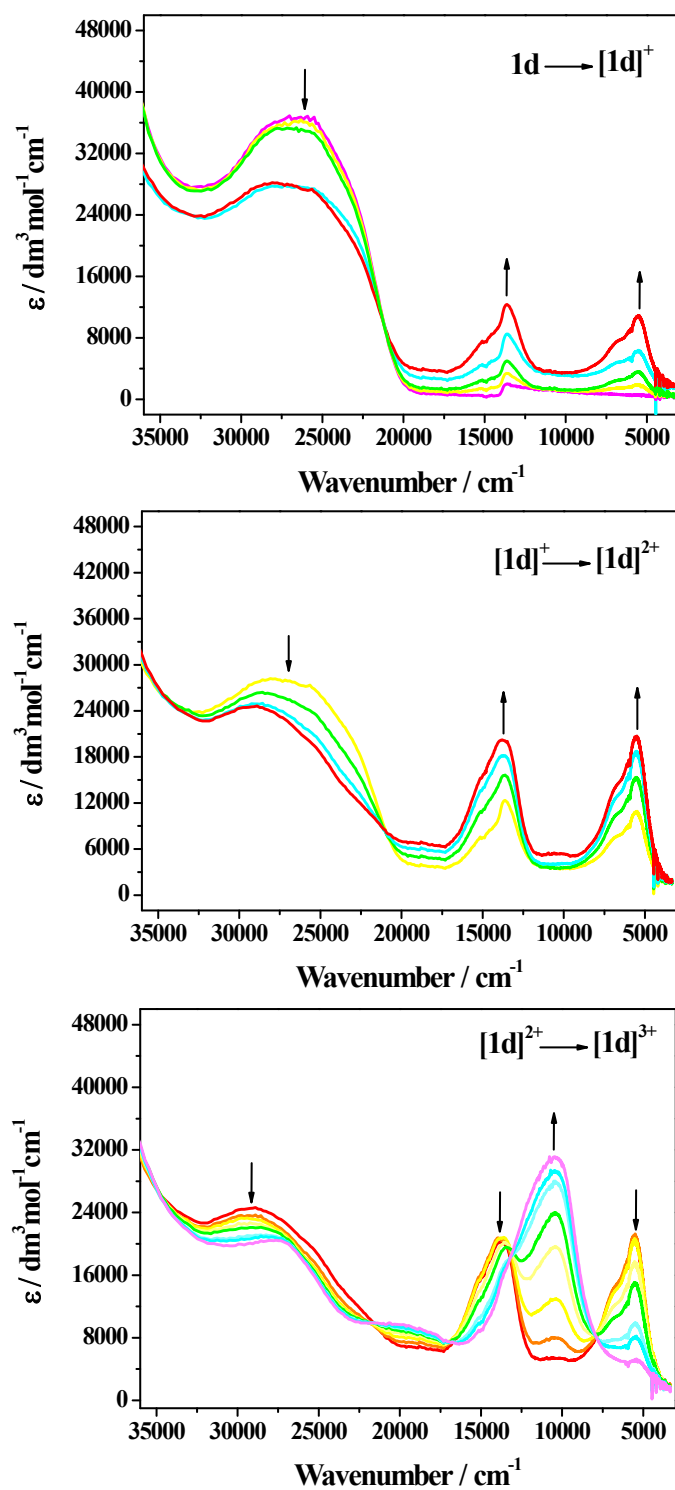

**Figure S5.** UV-vis-NIR spectral changes recorded during the stepwise oxidation of complex **1d** to  $[1\mathbf{d}]^+$  (top),  $[1\mathbf{d}]^{2+}$  (middle) and  $[1\mathbf{d}]^{3+}$  (bottom) in  $\text{CH}_2\text{Cl}_2/10^{-1} \text{ M } n\text{-Bu}_4\text{NPF}_6$  at 298 K within an OTTLE cell.

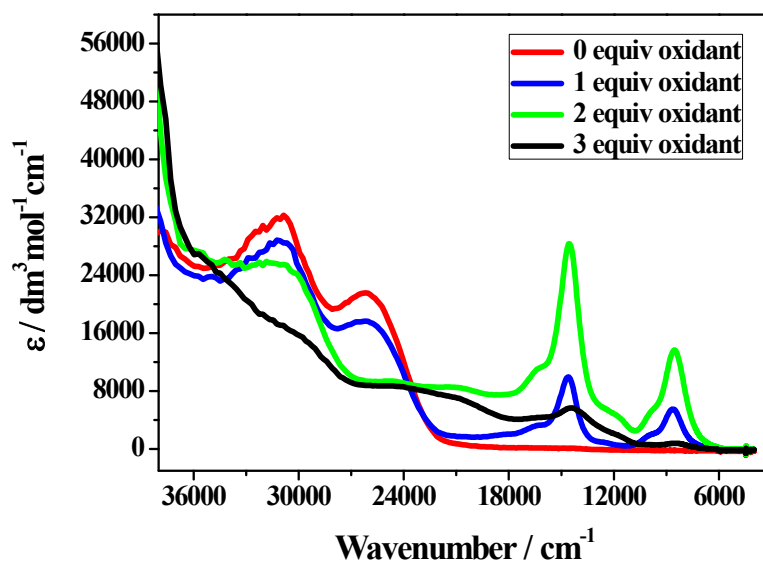

**Figure S6.** Electronic absorption spectra of **1a** (red), **[1a]<sup>+</sup>** (blue), **[1a]<sup>2+</sup>** (green) and **[1a]<sup>3+</sup>** (black) recorded in the course of stepwise oxidation of **1a** with thianthrenium hexafluorophosphate (TAPF<sub>6</sub>) in CH<sub>2</sub>Cl<sub>2</sub> at room temperature.

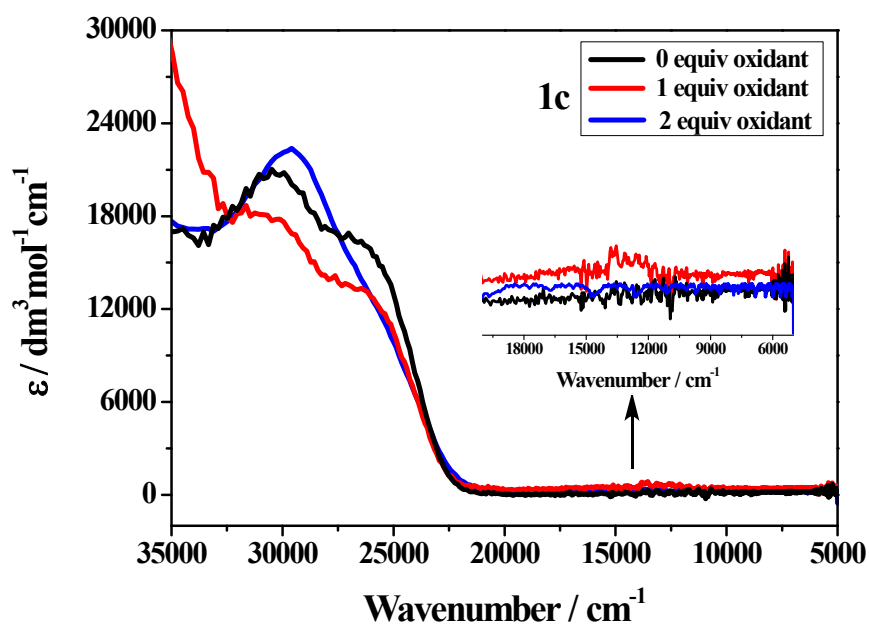

**Figure S7.** Electronic absorption spectra of **1c** (black), **[1c]<sup>+</sup>** (red) and **[1c]<sup>2+</sup>** (blue) recorded in the course of stepwise oxidation of **1c** with thianthrenium hexafluorophosphate (TAPF<sub>6</sub>) in CH<sub>2</sub>Cl<sub>2</sub> at room temperature.

## DFT Calculations

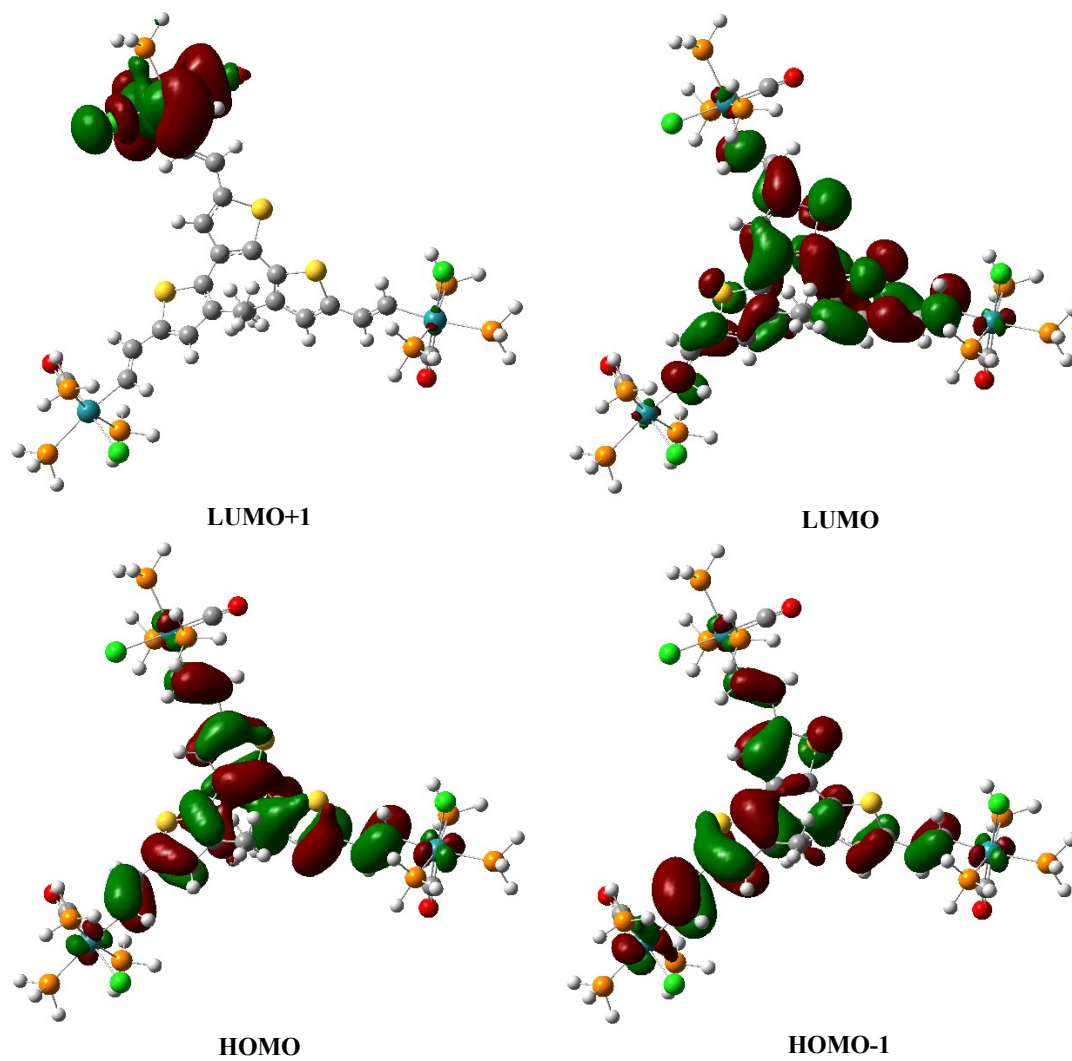

**Figure S8.** Selected frontier molecular orbitals of complex [1a-H] plotted with contour values  $\pm 0.04 \text{ (e/bohr}^3)^{1/2}$

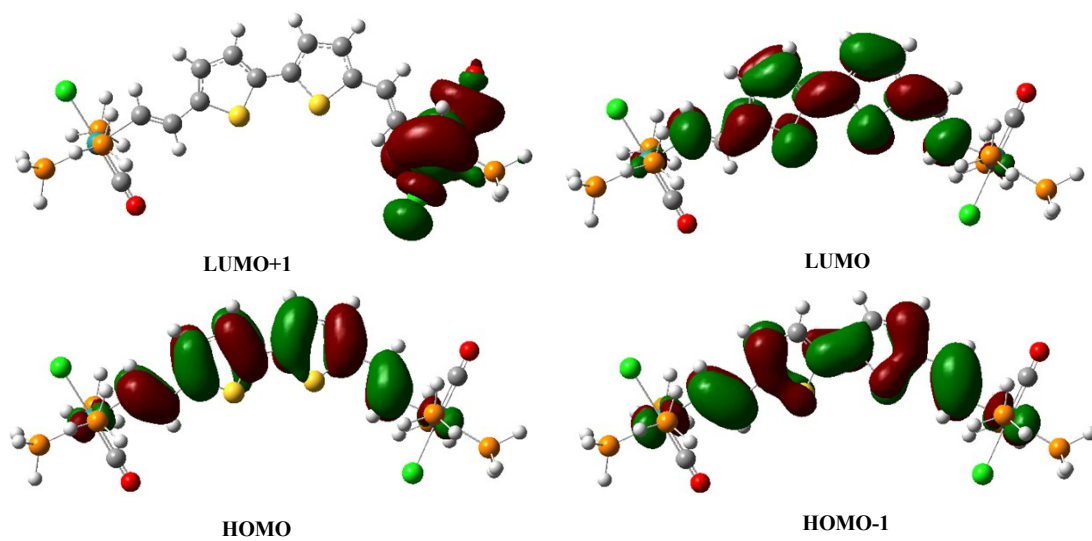

**Figure S9.** Selected frontier molecular orbitals of complex [1b-H] plotted with contour values  $\pm 0.04$  (e/bohr<sup>3</sup>)<sup>1/2</sup>

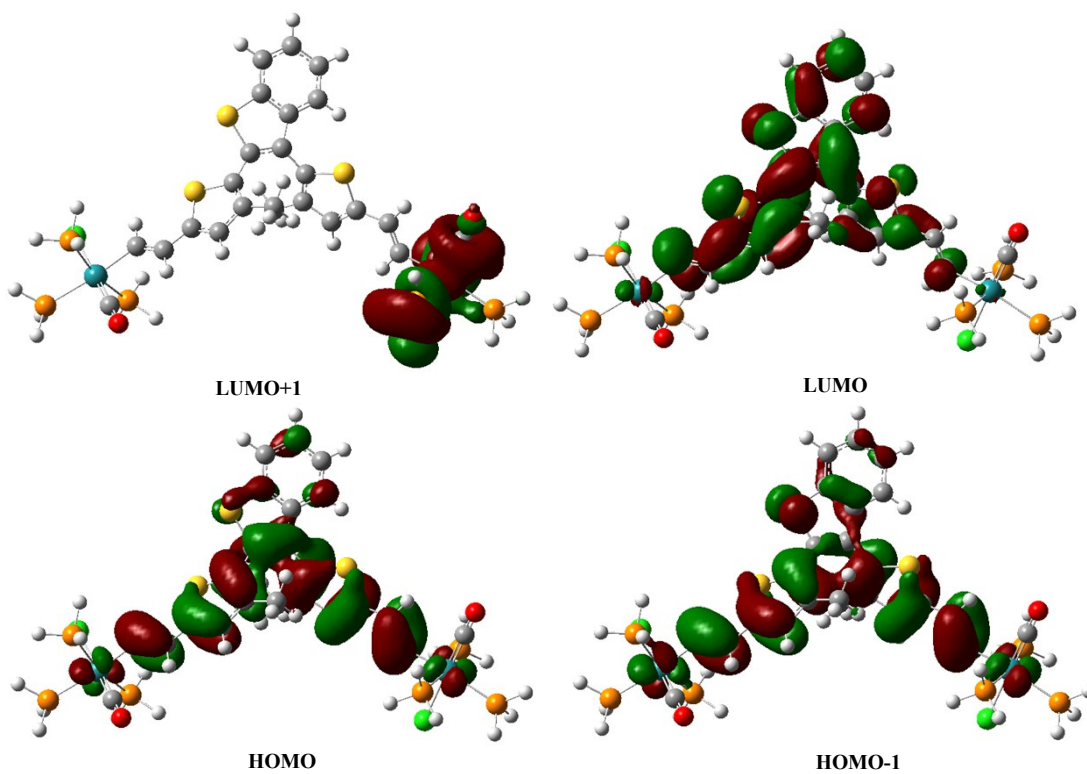

**Figure S10.** Selected frontier molecular orbitals of complex [1c-H] plotted with contour values  $\pm 0.04$  (e/bohr<sup>3</sup>)<sup>1/2</sup>



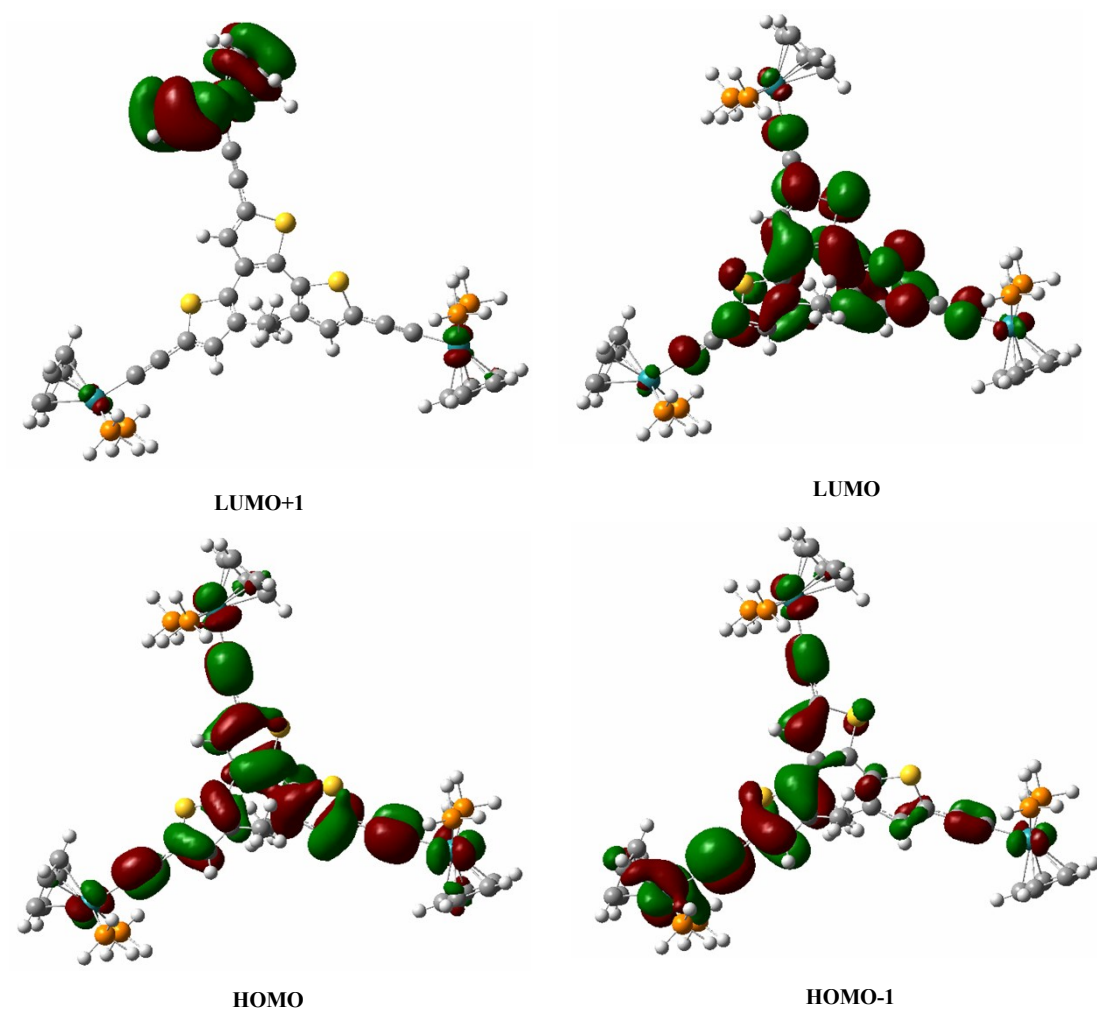

**Figure S11.** Selected frontier molecular orbitals of complex [1d-H] plotted with contour values  $\pm 0.04$  (e/bohr<sup>3</sup>)<sup>1/2</sup>

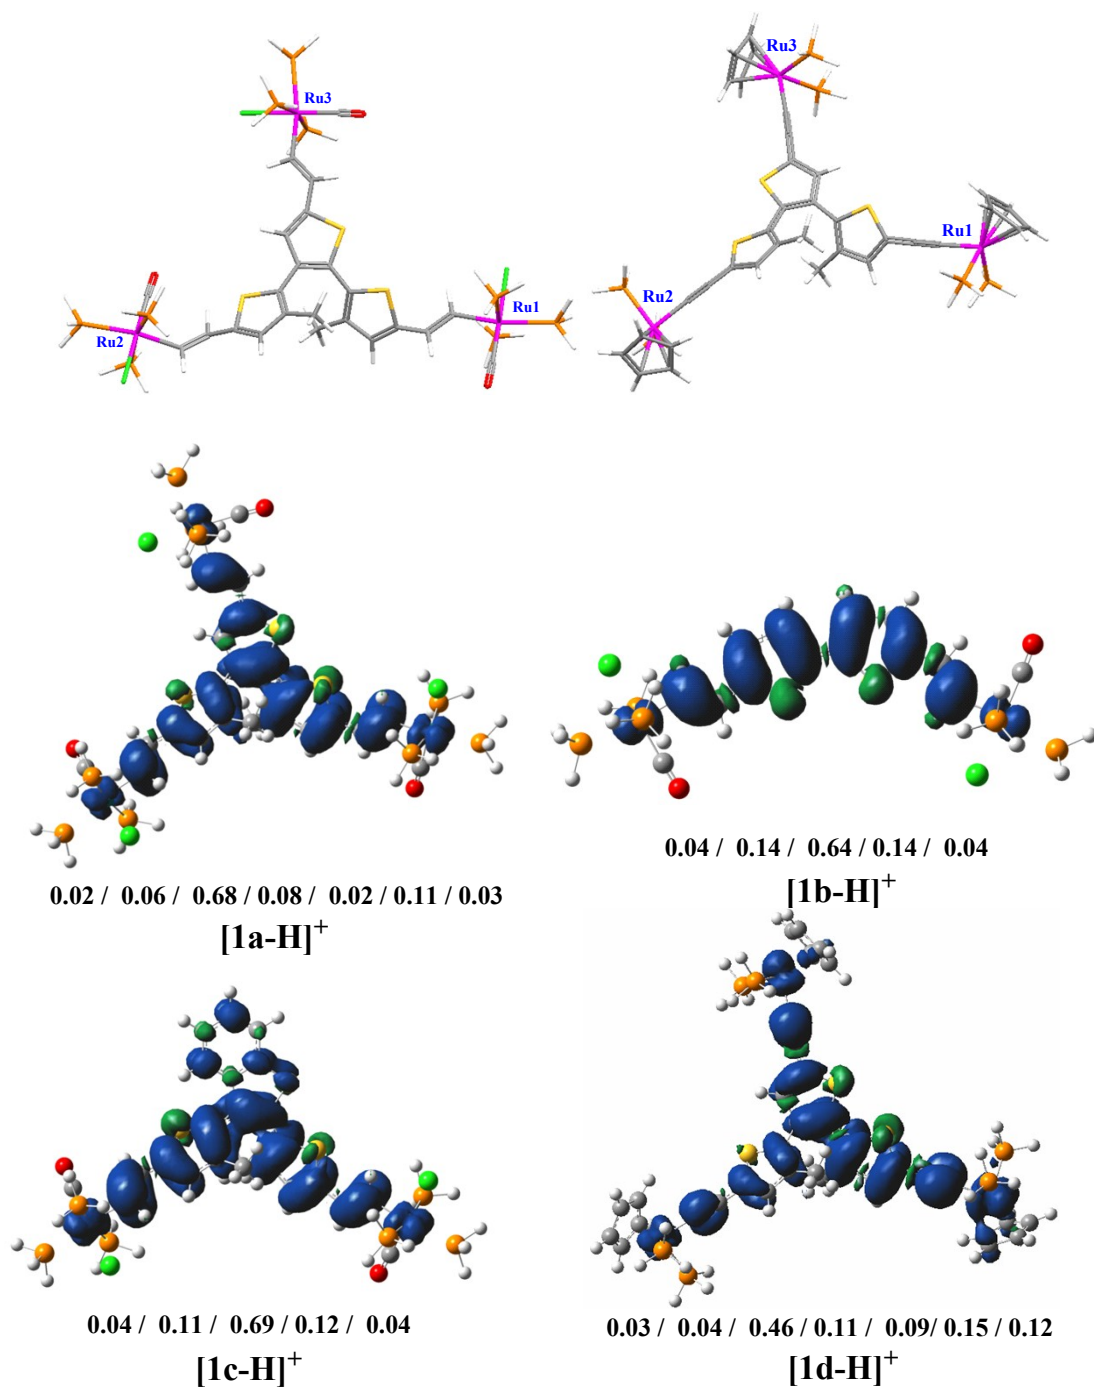

**Figure S12.** Spin-density distribution in **[1a-H]<sup>+</sup>** (Ru2/CH=CH/oligothiophene/CH=CH/Ru3/CH=CH/Ru1), **[1b-H]<sup>+</sup>** and **[1c-H]<sup>+</sup>** (Ru/CH=CH/oligothiophene/CH=CH/Ru), and **[1d-H]<sup>+</sup>** (Ru2/CH=CH/oligothiophene/CH=CH/Ru3/CH=CH/Ru1) with the corresponding compositions. Contour values:  $\pm 0.04$  ( $e/\text{bohr}^3$ )<sup>1/2</sup>. B3LYP/6-31G\* (Ru: Lanl2DZ) /CPCM /CH<sub>2</sub>Cl<sub>2</sub>.



**Table S2.** Energy and composition of frontier molecular orbitals of the model complexes **[1b-H]**,**[1b-H]<sup>+</sup>**, **[1b-H]<sup>2+</sup>** and **[1c-H]**. B3LYP / 6-31G\* (Ru: Lanl2DZ) / CPCM / CH<sub>2</sub>Cl<sub>2</sub>.

|                            | MO  | eV             | (CO)1 | Cl1 | (PH <sub>3</sub> ) <sub>2</sub> 1 | Ru1 | (C=C)1 | oligothiophene | (C=C)2 | Ru2 | (PH <sub>3</sub> ) <sub>2</sub> 2 | Cl2 | (CO)2 |
|----------------------------|-----|----------------|-------|-----|-----------------------------------|-----|--------|----------------|--------|-----|-----------------------------------|-----|-------|
| <b>[1b-H]</b>              | 159 | L+1            | -1.10 | 8   | 8                                 | 29  | 55     | 0              | 0      | 0   | 0                                 | 0   | 0     |
|                            | 158 | LUMO           | -1.48 | 0   | 0                                 | 0   | 2      | 10             | 74     | 12  | 2                                 | 0   | 0     |
|                            | 157 | HOMO           | -4.69 | 0   | 0                                 | 0   | 3      | 14             | 66     | 14  | 3                                 | 0   | 0     |
|                            | 156 | H-1            | -5.74 | 0   | 0                                 | 0   | 9      | 22             | 36     | 23  | 10                                | 0   | 0     |
| <b>[1b-H]<sup>+</sup></b>  | 158 | $\alpha$ -LUSO | -2.79 | 0   | 0                                 | 0   | 3      | 11             | 75     | 10  | 2                                 | 0   | 0     |
|                            | 157 | $\alpha$ -HOSO | -5.59 | 0   | 0                                 | 0   | 6      | 15             | 56     | 16  | 7                                 | 0   | 0     |
|                            | 157 | $\beta$ -LUSO  | -4.28 | 0   | 0                                 | 0   | 4      | 14             | 64     | 14  | 4                                 | 0   | 0     |
|                            | 156 | $\beta$ -HOSO  | -6.23 | 0   | 0                                 | 0   | 11     | 19             | 38     | 21  | 11                                | 0   | 0     |
| <b>[1b-H]<sup>2+</sup></b> | 158 | L+1            | -3.50 | 0   | 0                                 | 0   | 3      | 13             | 68     | 13  | 3                                 | 0   | 0     |
|                            | 157 | LUMO           | -5.12 | 0   | 0                                 | 0   | 5      | 15             | 58     | 16  | 6                                 | 0   | 0     |
|                            | 156 | HOMO           | -7.00 | 0   | 0                                 | 0   | 13     | 17             | 39     | 18  | 13                                | 0   | 0     |
|                            | 155 | H-1            | -7.45 | 5   | 61                                | 3   | 29     | 2              | 0      | 0   | 0                                 | 0   | 0     |
| <b>[1c-H]</b>              | 201 | L+1            | -1.11 | 0   | 0                                 | 0   | 0      | 0              | 0      | 55  | 29                                | 8   | 8     |
|                            | 200 | LUMO           | -1.43 | 0   | 0                                 | 0   | 2      | 10             | 84     | 3   | 1                                 | 0   | 0     |
|                            | 199 | HOMO           | -4.95 | 0   | 0                                 | 0   | 3      | 11             | 69     | 14  | 3                                 | 0   | 0     |
|                            | 198 | H-1            | -5.33 | 0   | 0                                 | 0   | 5      | 17             | 58     | 15  | 5                                 | 0   | 0     |

**Table S3.** Energy and composition of frontier molecular orbitals of the model complex **[1d-H]** and **[1d-H]<sup>+</sup>**. B3LYP / 6-31G\* (Ru: Lanl2DZ) / CPCM / CH<sub>2</sub>Cl<sub>2</sub>.

| <b>[1d-H]</b>             |              |           |    |                                 |    |       |                                  |    |                                 |    |       |    |                                 |    |       |
|---------------------------|--------------|-----------|----|---------------------------------|----|-------|----------------------------------|----|---------------------------------|----|-------|----|---------------------------------|----|-------|
| M                         |              | eV        | Cp | (PH <sub>3</sub> ) <sub>2</sub> | Ru | (C≡C) | C <sub>14</sub> H <sub>9</sub> S | Cp | (PH <sub>3</sub> ) <sub>2</sub> | Ru | (C≡C) | Cp | (PH <sub>3</sub> ) <sub>2</sub> | Ru | (C≡C) |
| O                         |              |           | 1  | 1                               | 1  | 1     | 3                                | 2  | 2                               | 2  | 2     | 3  | 3                               | 3  | 3     |
| 221                       | L+1          | -<br>0.82 | 0  | 0                               | 1  | 0     | 0                                | 0  | 0                               | 2  | 0     | 27 | 30                              | 40 | 0     |
| 220                       | LUMO         | -<br>1.17 | 0  | 0                               | 2  | 5     | 81                               | 0  | 0                               | 1  | 3     | 0  | 1                               | 2  | 5     |
| 219                       | HOMO         | -<br>4.37 | 2  | 1                               | 7  | 12    | 49                               | 1  | 0                               | 4  | 6     | 1  | 1                               | 6  | 10    |
| 218                       | H-1          | -<br>4.74 | 0  | 0                               | 3  | 3     | 38                               | 4  | 2                               | 18 | 23    | 0  | 0                               | 4  | 5     |
| <b>[1d-H]<sup>+</sup></b> |              |           |    |                                 |    |       |                                  |    |                                 |    |       |    |                                 |    |       |
| M                         |              | eV        | Cp | (PH <sub>3</sub> ) <sub>2</sub> | Ru | (C≡C) | C <sub>14</sub> H <sub>9</sub> S | Cp | (PH <sub>3</sub> ) <sub>2</sub> | Ru | (C≡C) | Cp | (PH <sub>3</sub> ) <sub>2</sub> | Ru | (C≡C) |
| O                         |              |           | 1  | 1                               | 1  | 1     | 3                                | 2  | 2                               | 2  | 2     | 3  | 3                               | 3  | 3     |
| 219                       | β-LUSO       | -<br>3.98 | 1  | 1                               | 8  | 13    | 60                               | 0  | 0                               | 2  | 4     | 1  | 1                               | 5  | 4     |
| 218                       | β-HOSO       | -<br>4.96 | 0  | 0                               | 1  | 1     | 36                               | 4  | 2                               | 22 | 24    | 1  | 0                               | 4  | 5     |
| 217                       | β-HOSO-<br>1 | -<br>5.29 | 3  | 2                               | 16 | 13    | 28                               | 0  | 0                               | 0  | 0     | 4  | 2                               | 18 | 14    |
| 209                       | β-HOSO-<br>9 | -<br>6.52 | 2  | 1                               | 10 | 2     | 52                               | 4  | 1                               | 13 | 3     | 2  | 1                               | 7  | 2     |

**Table S4.** Comparison of calculated IR  $\nu(\text{C}\equiv\text{O})$  and  $\nu(\text{C}\equiv\text{C})$  wavenumbers ( $\text{cm}^{-1}$ ) (scaled by 0.95 and 0.9614 for BLYP35 and B3LYP, respectively) using different methods for  $[\mathbf{1a-H}]^{n+}$ -  $[\mathbf{1d-H}]^{n+}$  ( $n = 0, 1, 2$ ).

| Vibration                     | Complex                    | BLYP35                           | B3LYP                                                                | Experiment            |
|-------------------------------|----------------------------|----------------------------------|----------------------------------------------------------------------|-----------------------|
| $\nu(\text{C}\equiv\text{O})$ | <b>1a-H</b>                | 2251                             | 1954                                                                 | 1922                  |
|                               | <b>[1a-H]<sup>+</sup></b>  | 2254sh, 2261                     | 1965                                                                 | 1922                  |
|                               | <b>[1a-H]<sup>2+</sup></b> | 2263m, 2269s, 2277m <sup>a</sup> | 1972s, 1978m <sup>a</sup><br>1999s, 2011m, sh <sup>b</sup>           | 1922                  |
|                               | <b>1b-H</b>                | 2251                             | 1952                                                                 | 1923                  |
|                               | <b>[1b-H]<sup>+</sup></b>  | 2266                             | 1965                                                                 | 1927                  |
|                               | <b>[1b-H]<sup>2+</sup></b> | 2281                             | 1985                                                                 | 1935                  |
|                               | <b>1c-H</b>                | 2251                             | 1953                                                                 | 1923                  |
|                               | <b>[1c-H]<sup>+</sup></b>  | 2263                             | 1965                                                                 | 1923                  |
|                               | <b>[1c-H]<sup>2+</sup></b> | 2274                             | 1978                                                                 | 1924                  |
| $\nu(\text{C}\equiv\text{C})$ | <b>1d-H</b>                | 2318w                            | 2071w                                                                | 2051m                 |
|                               | <b>[1d-H]<sup>+</sup></b>  | 2255s, 2270m, 2298w              | 1980s, 2001m, 2046w                                                  | 1935s, 1992w, 2049m-w |
|                               | <b>[1d-H]<sup>2+</sup></b> | 2225s, 2239m, 2271w <sup>a</sup> | 1956s, 1961s, 2014w <sup>a</sup><br>1977s, 1997s, 2020w <sup>b</sup> | 1935s, 1992w, 2046w   |

<sup>a</sup> Singlet. <sup>b</sup> Triplet.

**Table S5.** Major electronic excitations in [1a-H]<sup>+</sup>-[1d-H]<sup>+</sup> determined by TD-DFT methods.<sup>a</sup>

| Complex             | Excited state | $\lambda/\text{nm}$ [ $\text{cm}^{-1}$ ] <sup>1</sup> | Osc. str ( $f$ ) | Major contributions                                                                                                      | Assignment                                                    |
|---------------------|---------------|-------------------------------------------------------|------------------|--------------------------------------------------------------------------------------------------------------------------|---------------------------------------------------------------|
| [1a-H] <sup>+</sup> | $D_1$         | 1170<br>[8547]                                        | 0.1888           | $\beta\text{-HOSO}\rightarrow\beta\text{-LUSO}$<br>(98%)                                                                 | bridge $\pi\text{-}\pi^*$ / MLCT                              |
|                     | $D_2$         | 863<br>[11587]                                        | 0.4766           | $\beta\text{-HOSO-1}\rightarrow\beta\text{-LUSO}$<br>(96%)                                                               | bridge $\pi\text{-}\pi^*$ / MLCT                              |
|                     | $D_3$         | 574<br>[17421]                                        | 0.6029           | $\alpha\text{-HOSO}\rightarrow\alpha\text{-LUSO}$<br>(75%)                                                               | bridge $\pi\text{-}\pi^*$                                     |
| [1b-H] <sup>+</sup> | $D_1$         | 790<br>[12658]                                        | 0.3813           | $\beta\text{-HOSO}\rightarrow\beta\text{-LUSO}$<br>(91%)<br>$\alpha\text{-HOSO}\rightarrow\alpha\text{-LUSO}$<br>(39%)   | bridge $\pi\text{-}\pi^*$ /MLCT<br>MLCT/ ML $\rightarrow$ LCT |
|                     | $D_4$         | 578<br>[17301]                                        | 1.4791           | $\alpha\text{-HOSO}\rightarrow\alpha\text{-LUSO}$<br>(85%)                                                               | MLCT/ ML $\rightarrow$ LCT                                    |
|                     | $D_{10}$      | 380<br>[26315]                                        | 0.0383           | $\beta\text{-HOSO-5}\rightarrow\beta\text{-LUSO}$<br>(72%)                                                               | CI $\rightarrow$ LCT                                          |
| [1c-H] <sup>+</sup> | $D_1$         | 1479<br>[6761]                                        | 0.3353           | $\beta\text{-HOSO}\rightarrow\beta\text{-LUSO}$<br>(98%)                                                                 | MLCT/ ML $\rightarrow$ LCT                                    |
|                     | $D_2$         | 696<br>[14367]                                        | 0.1866           | $\beta\text{-HOSO-1}\rightarrow\beta\text{-LUSO}$<br>(97%)<br>$\alpha\text{-HOSO}\rightarrow\alpha\text{-LUSO}$<br>(64%) | CI $\rightarrow$ LCT<br>MLCT                                  |
|                     | $D_3$         | 562<br>[17793]                                        | 0.1557           | $\beta\text{-HOSO}\rightarrow\beta\text{-LUSO}$<br>(23%)                                                                 | MLCT/ ML $\rightarrow$ LCT                                    |
| [1d-H] <sup>+</sup> | $D_1$         | 1290<br>[7751]                                        | 0.2668           | $\beta\text{-HOSO}\rightarrow\beta\text{-LUSO}$<br>(94%)                                                                 | MLCT / bridge $\pi\text{-}\pi^*$                              |
|                     | $D_2$         | 1213<br>[8244]                                        | 0.6604           | $\beta\text{-HOSO-1}\rightarrow\beta\text{-LUSO}$<br>(94%)                                                               | MLCT/ bridge $\pi\text{-}\pi^*$                               |
|                     | $D_5$         | 600<br>[16667]                                        | 0.0854           | $\beta\text{-HOSO-2}\rightarrow\beta\text{-LUSO}$<br>(73%)                                                               | MLCT                                                          |

<sup>a</sup> The computation method is BLYP35 / 6-31G\* (Ru: Lanl2DZ) / CPCM / CH<sub>2</sub>Cl<sub>2</sub>. *D* = doublet.

**Table S6.** Major electronic excitations in [1b-H]<sup>+</sup> and [1c-H]<sup>+</sup> determined by TD-DFT methods.<sup>a</sup>

| Complex             | Excited state         | $\lambda/\text{nm}$ [cm <sup>-1</sup> ] | Osc. str ( <i>f</i> ) | Major contributions                     | Assignment                      |
|---------------------|-----------------------|-----------------------------------------|-----------------------|-----------------------------------------|---------------------------------|
| [1b-H] <sup>+</sup> | <i>D</i> <sub>1</sub> | 923<br>[10834]                          | 0.3381                | $\beta$ -HOSO→ $\beta$ -LUSO<br>(91%)   | bridge $\pi$ - $\pi^*$ / MLCT   |
|                     | <i>D</i> <sub>2</sub> | 606<br>[16501]                          | 1.4867                | $\alpha$ -HOSO→ $\alpha$ -LUSO<br>(87%) | bridge $\pi$ - $\pi^*$ / MLCT   |
|                     | <i>D</i> <sub>9</sub> | 461<br>[21691]                          | 0.0112                | $\beta$ -HOSO→ $\beta$ -LUSO+1<br>(64%) | bridge $\pi$ - $\pi^*$          |
| [1c-H] <sup>+</sup> | <i>D</i> <sub>2</sub> | 844<br>[11848]                          | 0.1283                | $\beta$ -HOSO-1→ $\beta$ -LUSO<br>(99%) | ILCT/ bridge $\pi$ - $\pi^*$    |
|                     | <i>D</i> <sub>3</sub> | 690<br>[14492]                          | 0.1023                | $\beta$ -HOSO-3→ $\beta$ -LUSO<br>(92%) | Cl →LCT/ bridge $\pi$ - $\pi^*$ |

<sup>a</sup> The computation method is B3LYP / 6-31G\* (Ru: Lanl2DZ) / CPCM / CH<sub>2</sub>Cl<sub>2</sub>. *D* = doublet.



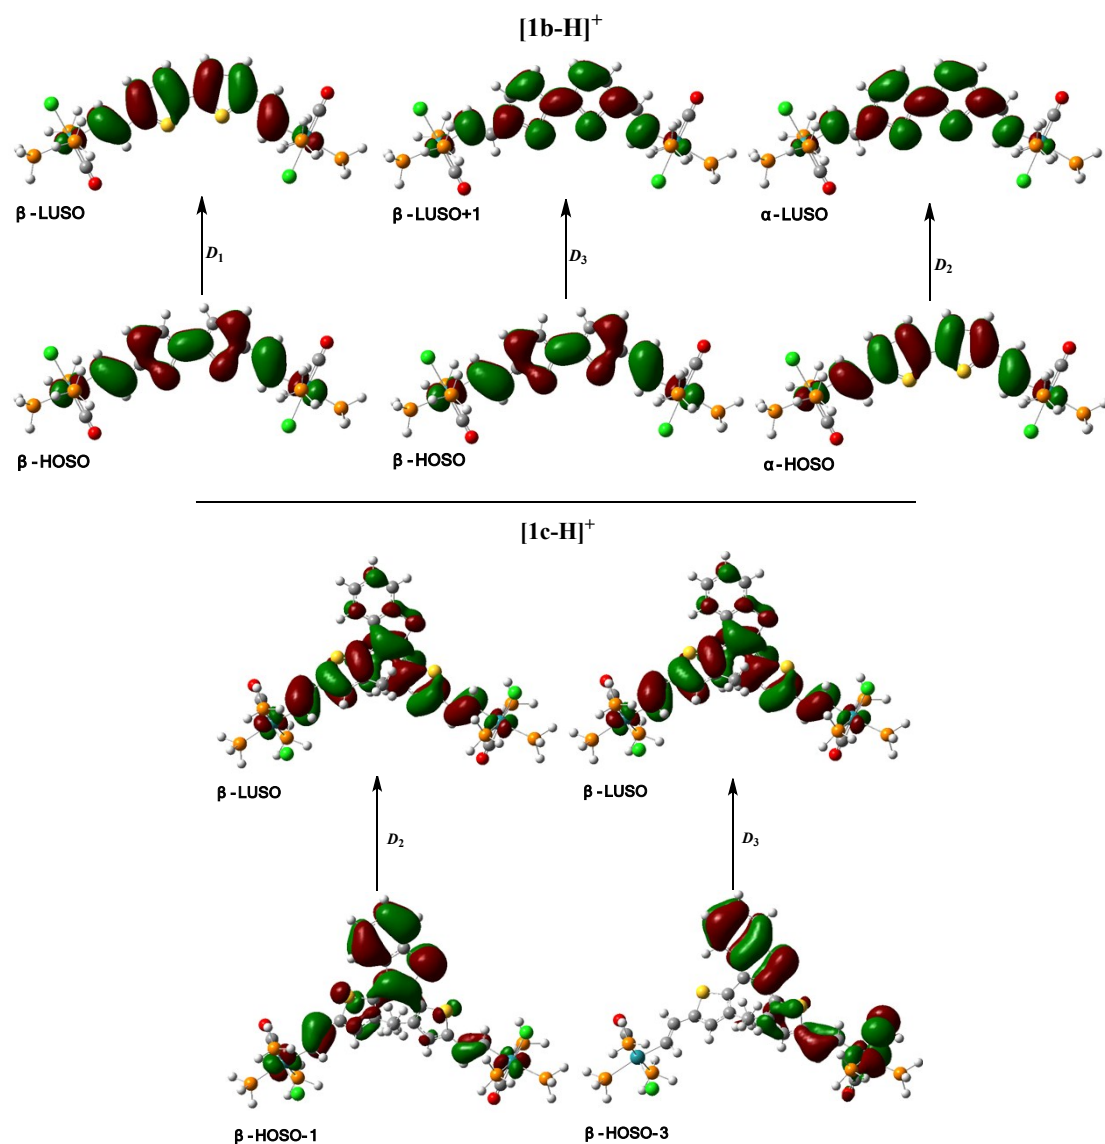

**Figure S13.** Spin orbitals involved in the major electronic excitations of  $[1b-H]^+$  and  $[1c-H]^+$  shown in Table S6 ( $D$  = doublet). B3LYP / 6-31G\* (Ru: Lan12DZ) / CPCM /  $CH_2Cl_2$ .

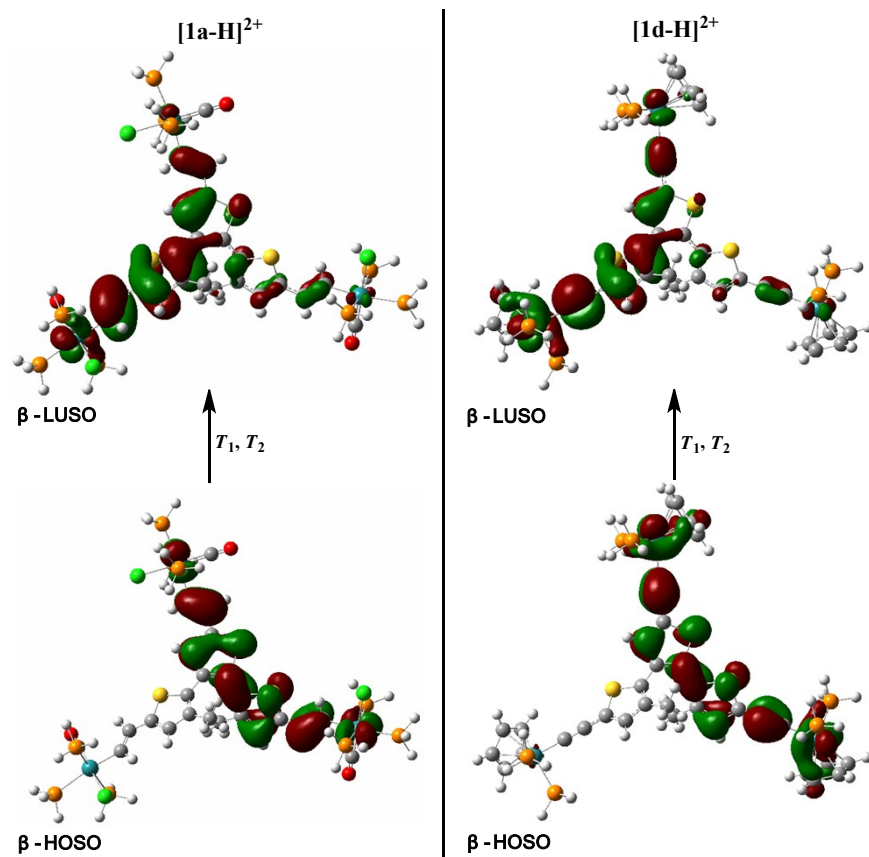

**Figure S14.** Spin orbitals involved in the electronic excitations of the main NIR absorptions for [**1a-H**]<sup>2+</sup> and [**1d-H**]<sup>2+</sup> shown in Table 4 (*T* = triplet). B3LYP / 6-31G\* (Ru: Lanl2DZ) / CPCM / CH<sub>2</sub>Cl<sub>2</sub>.

# NMR Spectra

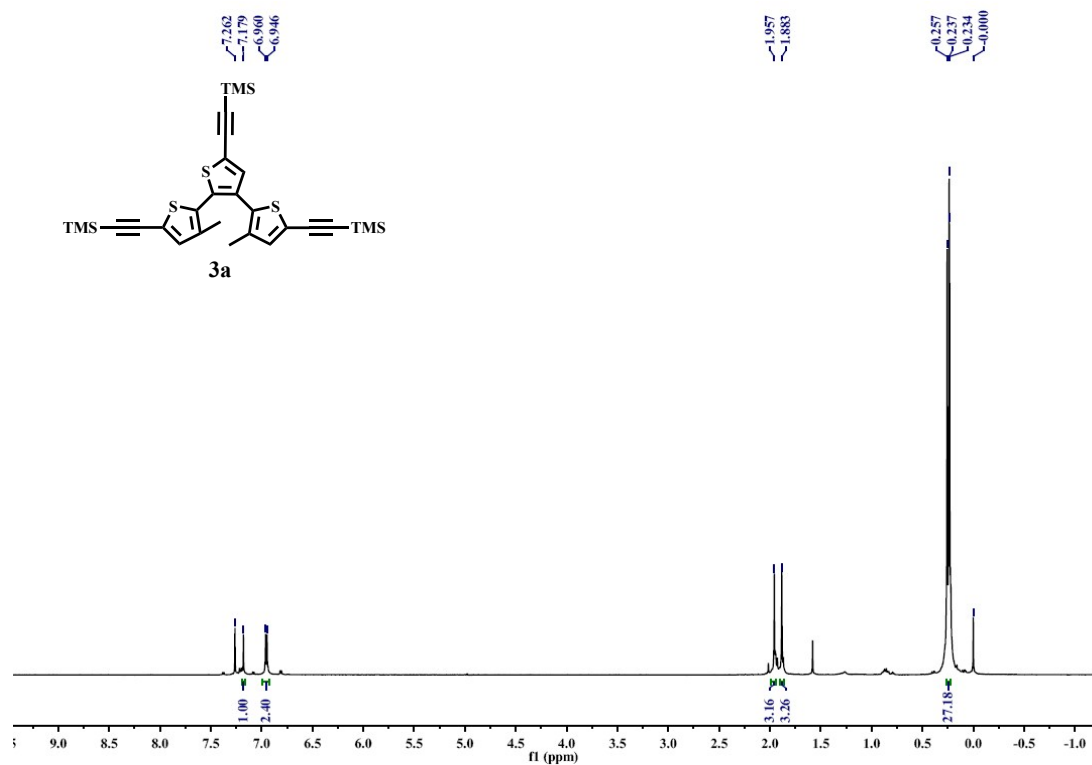

Figure S15.  $^1\text{H}$  NMR spectrum (400 MHz,  $\text{CDCl}_3$ ) of **3a**.

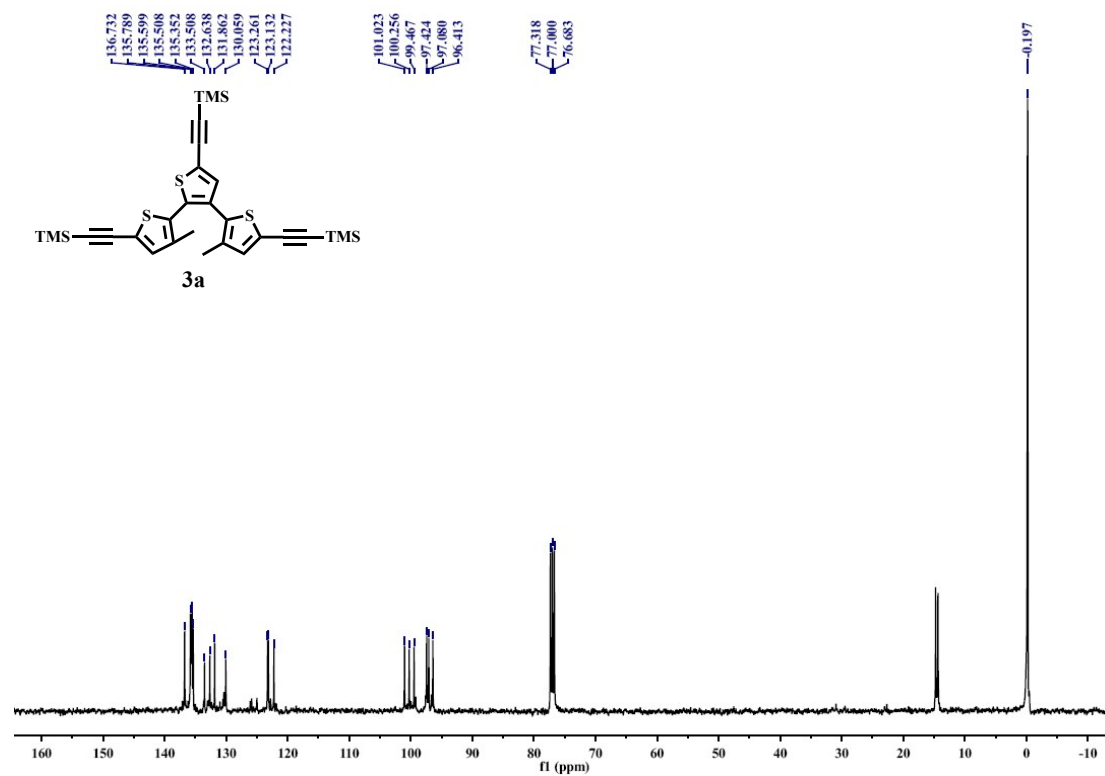

Figure S16.  $^{13}\text{C}$  NMR spectrum (100 MHz,  $\text{CDCl}_3$ ) of **3a**.

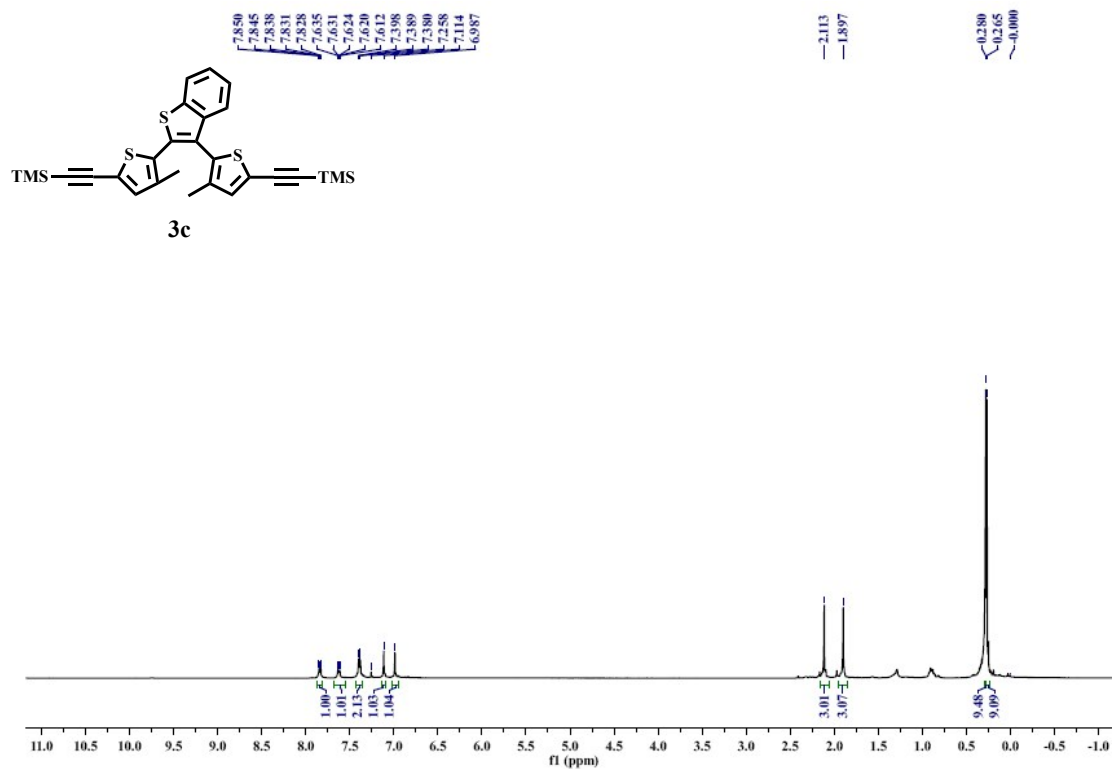

Figure S17.  $^1\text{H}$  NMR spectrum (400 MHz,  $\text{CDCl}_3$ ) of **3c**.

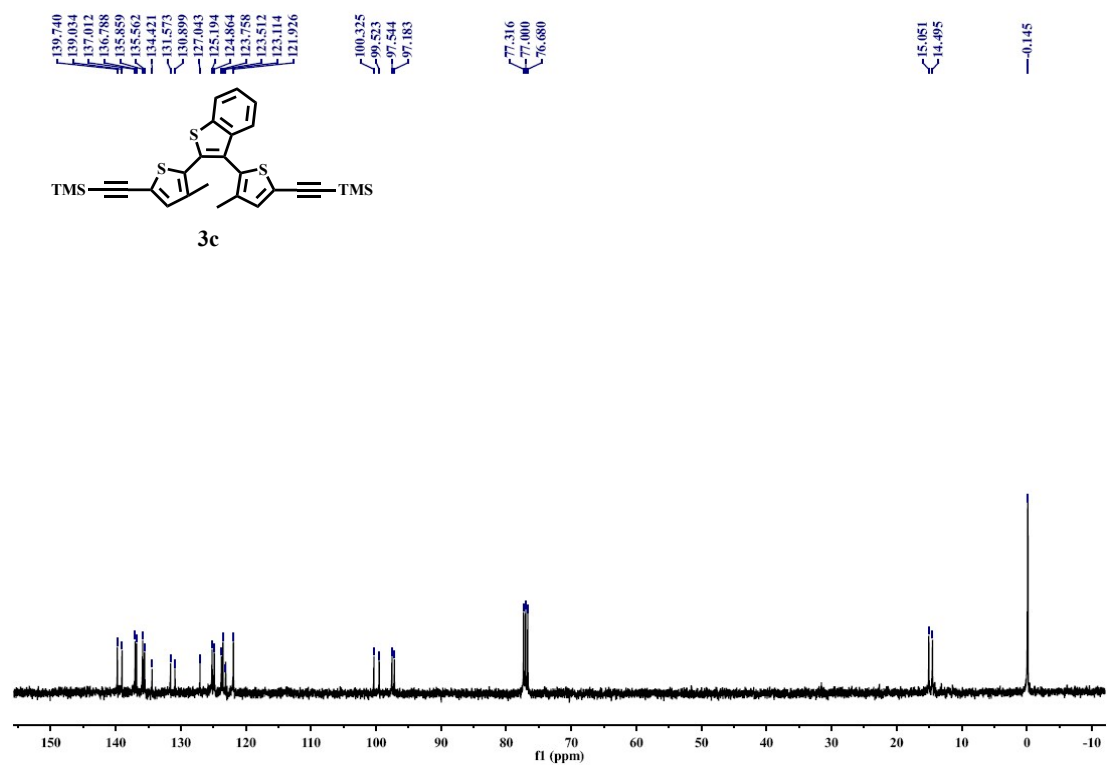

Figure S18.  $^{13}\text{C}$  NMR spectrum (100 MHz,  $\text{CDCl}_3$ ) of **3c**.

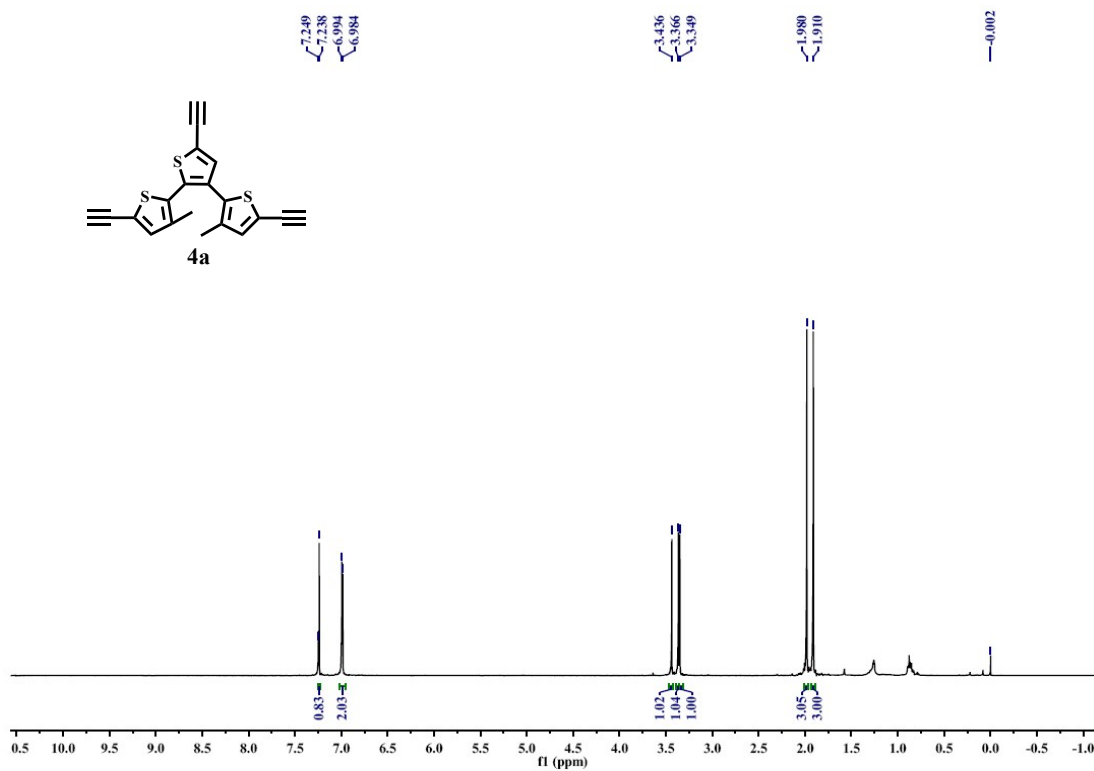

Figure S19. <sup>1</sup>H NMR spectrum (400 MHz, CDCl<sub>3</sub>) of **4a**.

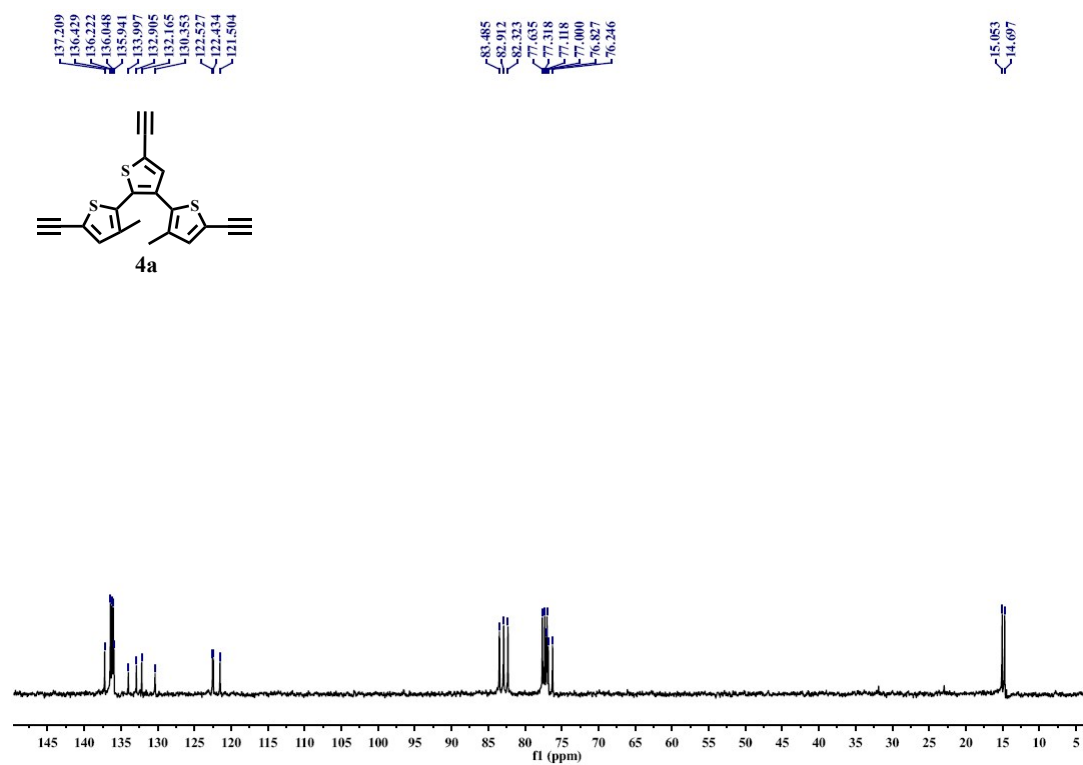

Figure S20. <sup>13</sup>C NMR spectrum (100 MHz, CDCl<sub>3</sub>) of **4a**.

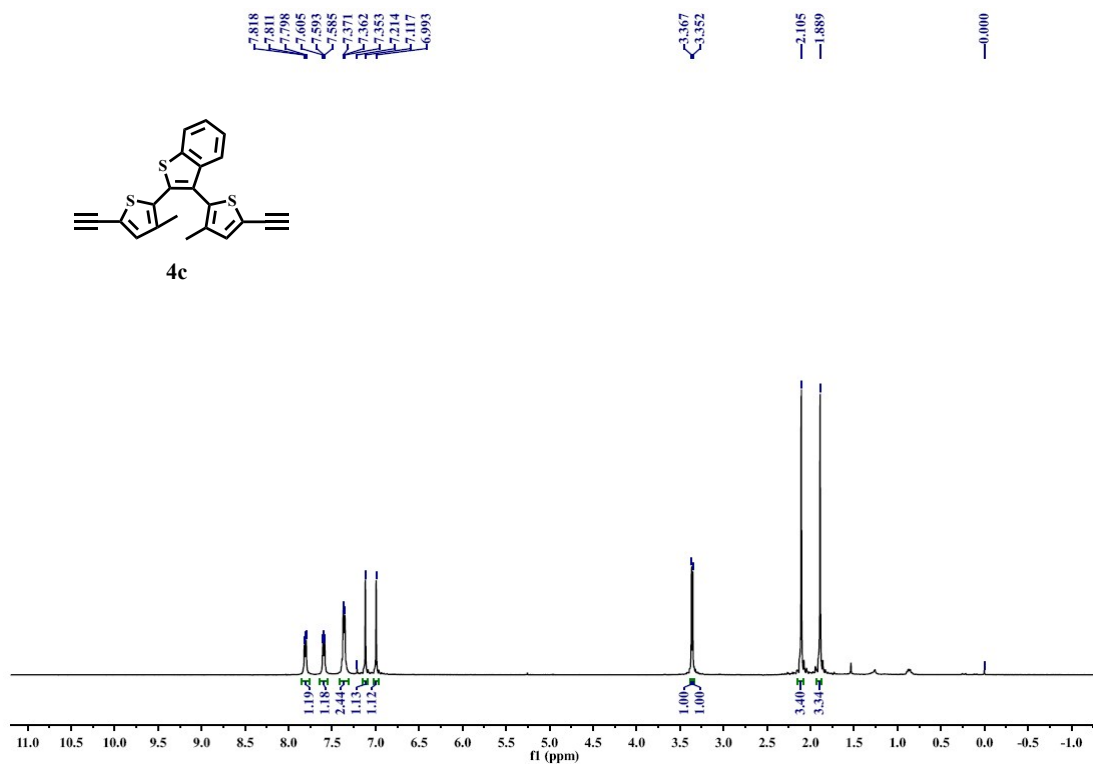

Figure S21.  $^1\text{H}$  NMR spectrum (400 MHz,  $\text{CDCl}_3$ ) of **4c**.

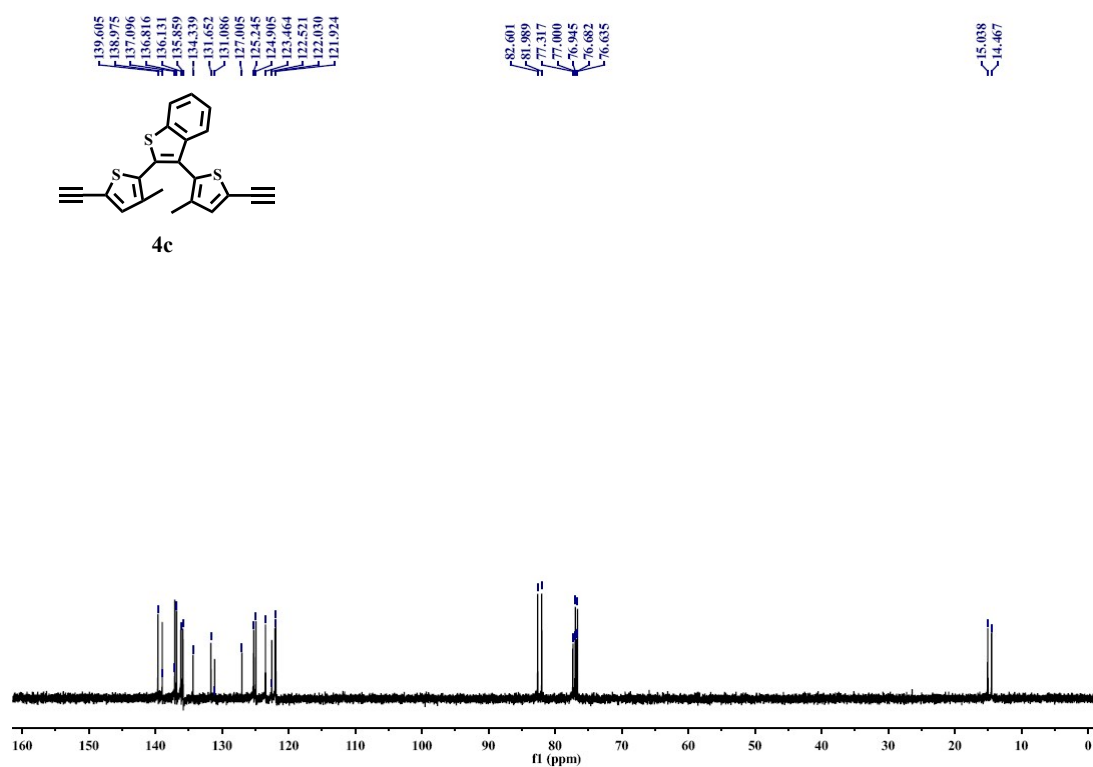

Figure S22.  $^{13}\text{C}$  NMR spectrum (100 MHz,  $\text{CDCl}_3$ ) of **4c**.

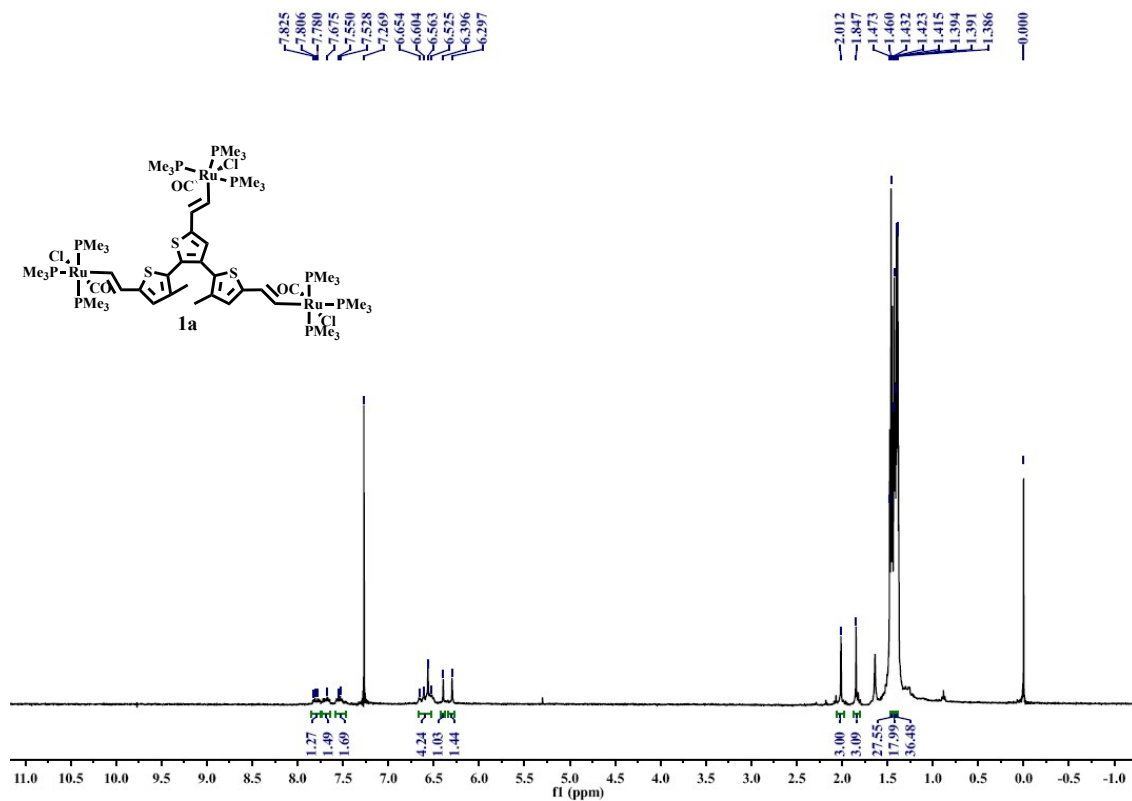

Figure S23.  $^1\text{H}$  NMR spectrum (400 MHz,  $\text{CDCl}_3$ ) of **1a**.

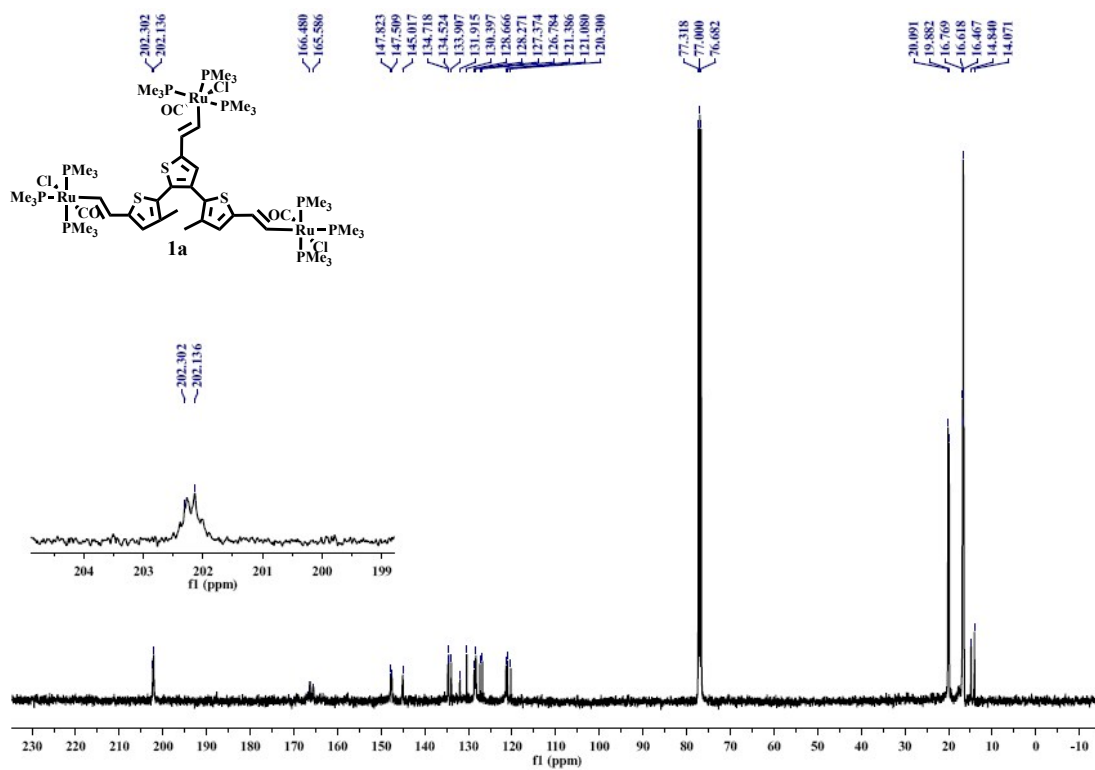

Figure S24.  $^{13}\text{C}$  NMR spectrum (100 MHz,  $\text{CDCl}_3$ ) of **1a**.

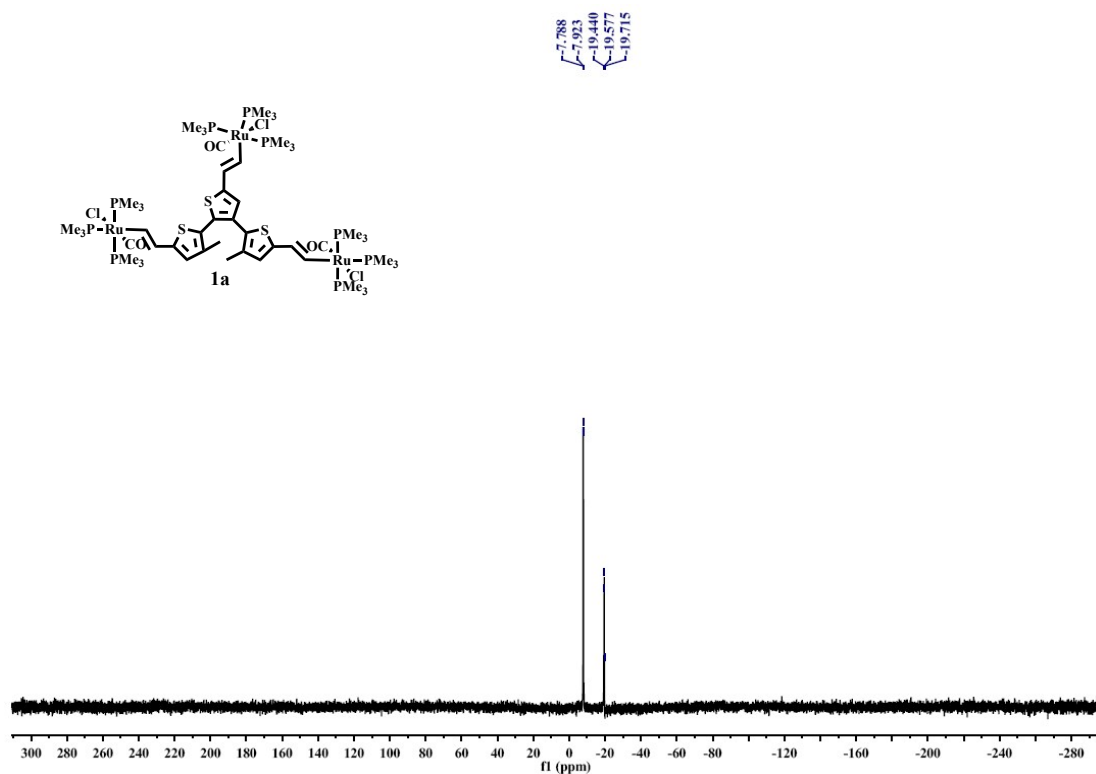

Figure S25.  $^{31}\text{P}$  NMR spectrum (160 MHz,  $\text{CDCl}_3$ ) of **1a**.

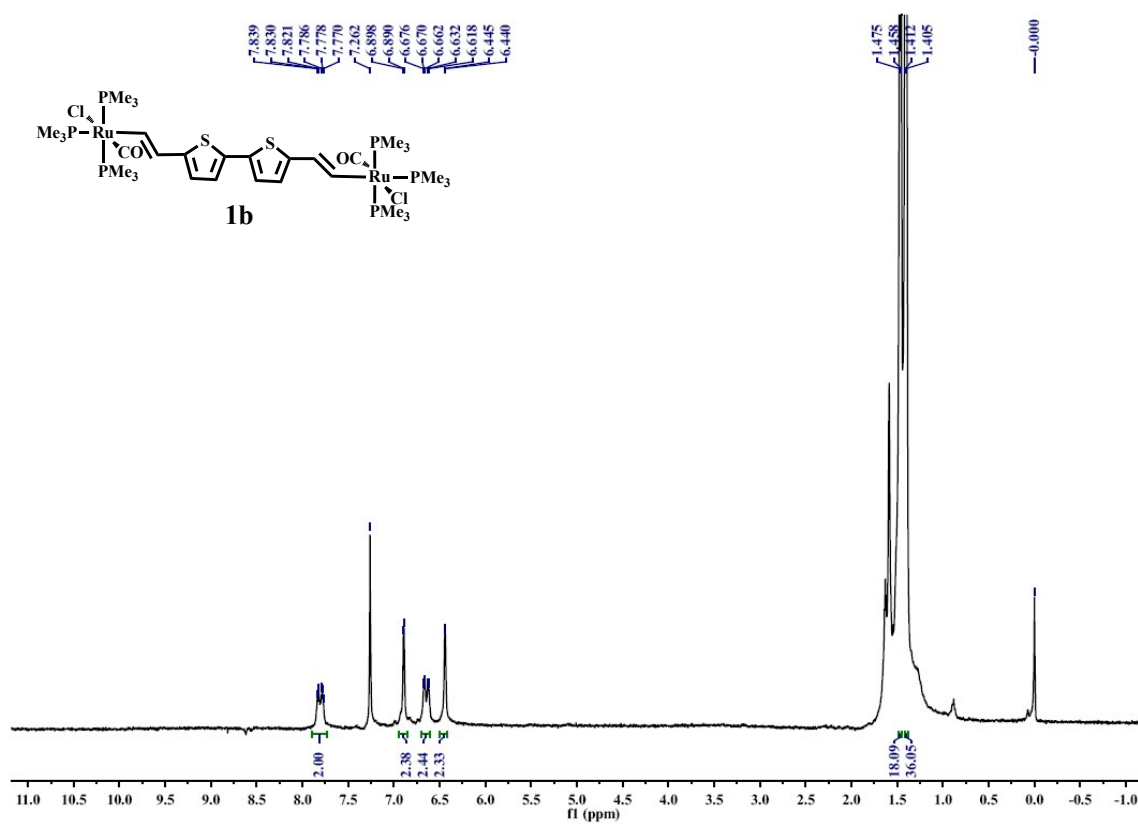

Figure S26.  $^1\text{H}$  NMR spectrum (400 MHz,  $\text{CDCl}_3$ ) of **1b**.



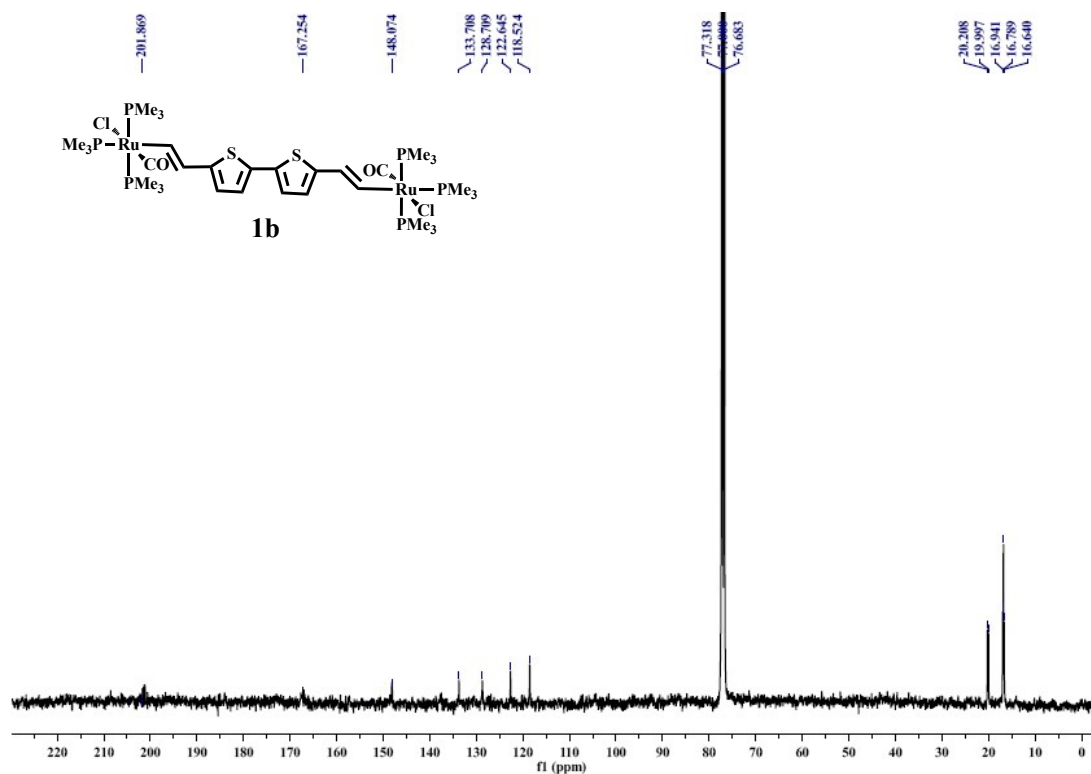

Figure S27.  $^{13}\text{C}$  NMR spectrum (100 MHz,  $\text{CDCl}_3$ ) of **1b**.

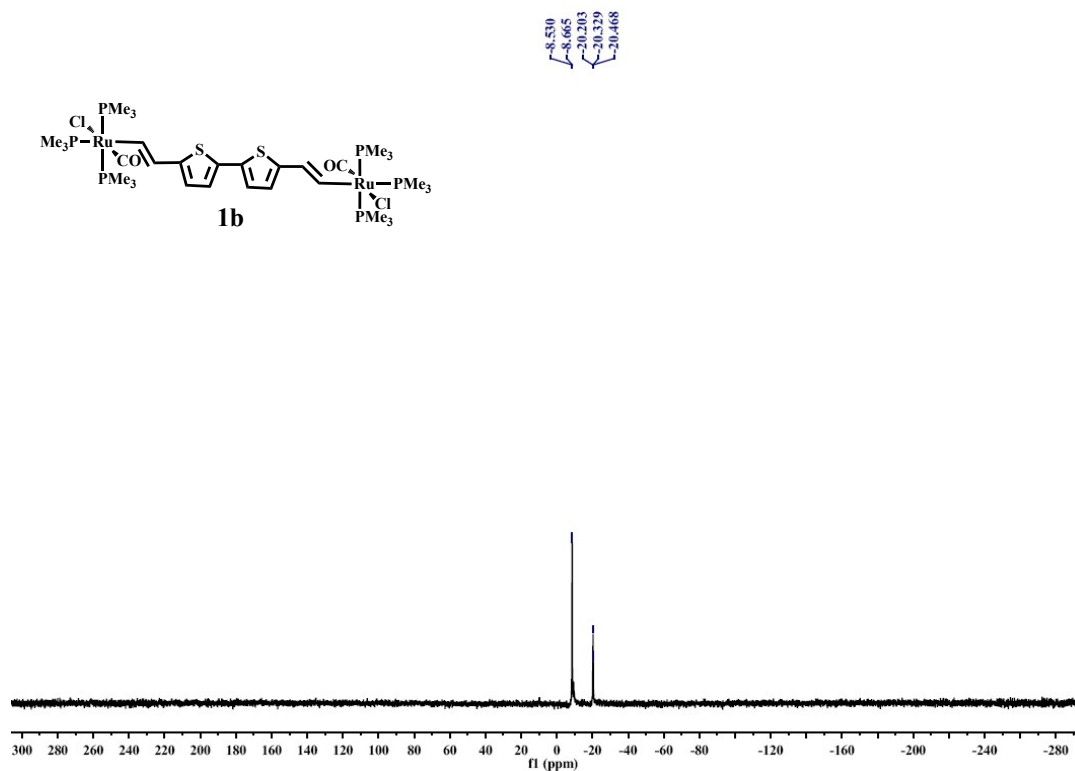

Figure S28.  $^{31}\text{P}$  NMR spectrum (160 MHz,  $\text{CDCl}_3$ ) of **1b**.

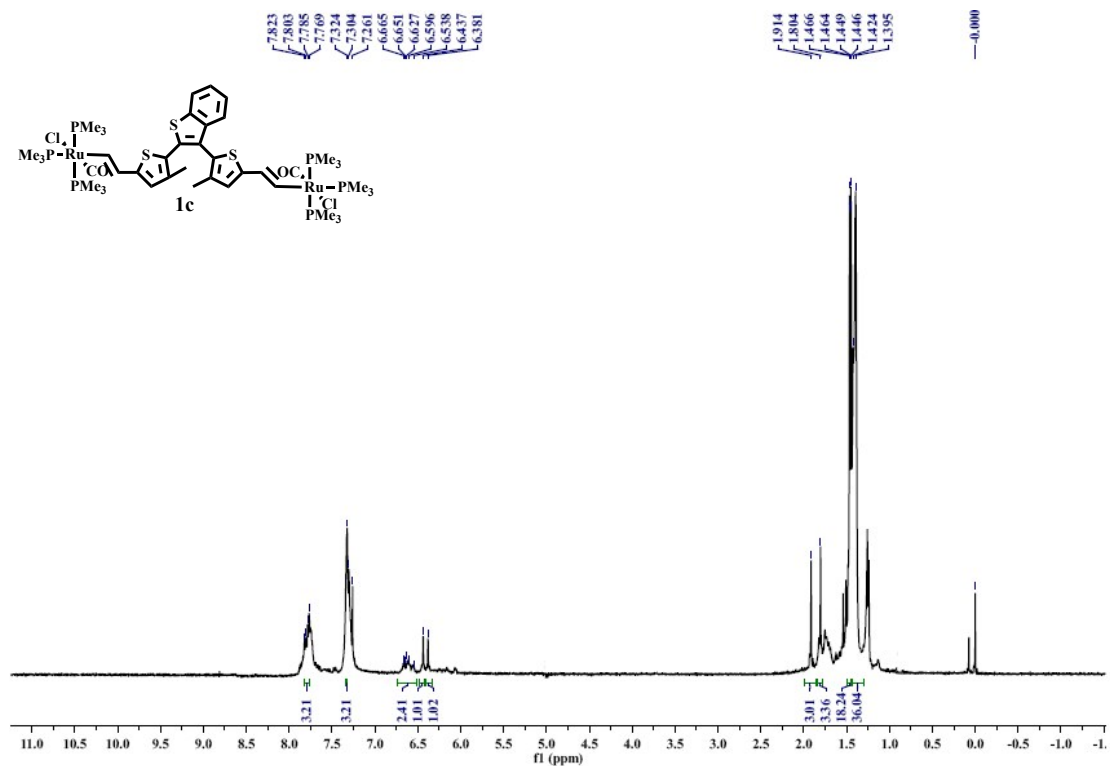

Figure S29.  $^1\text{H}$  NMR spectrum (400 MHz,  $\text{CDCl}_3$ ) of **1c**.

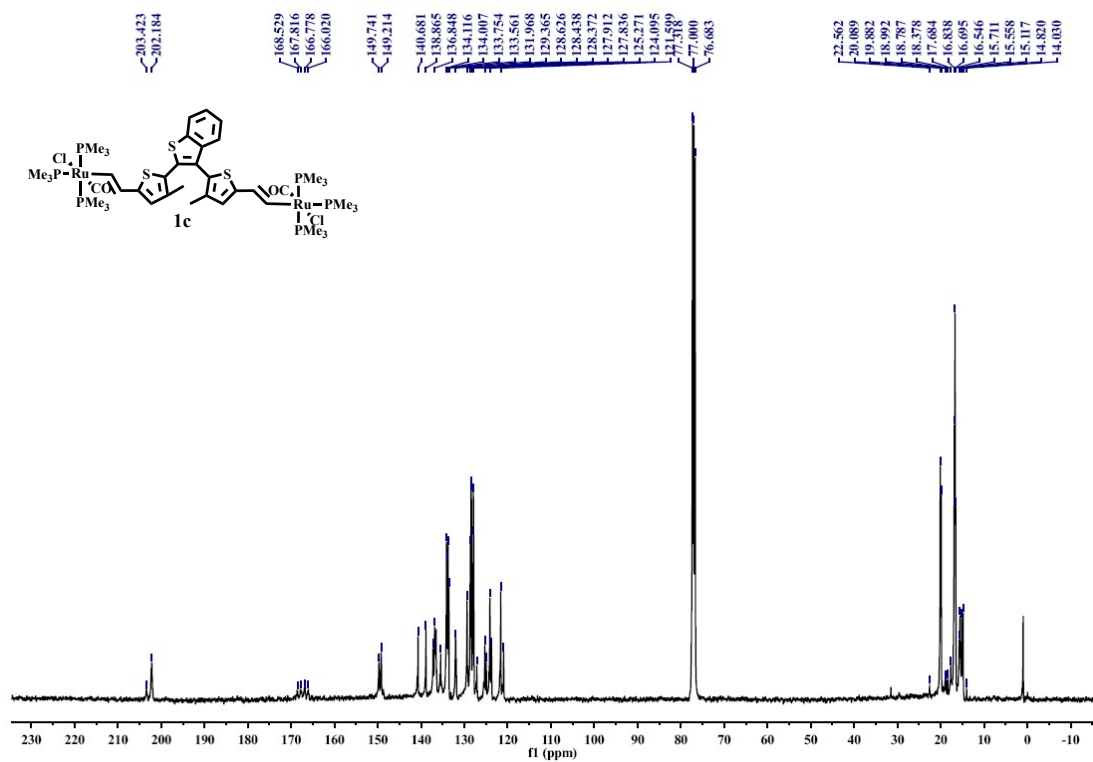

Figure S30.  $^{13}\text{C}$  NMR spectrum (100 MHz,  $\text{CDCl}_3$ ) of **1c**.

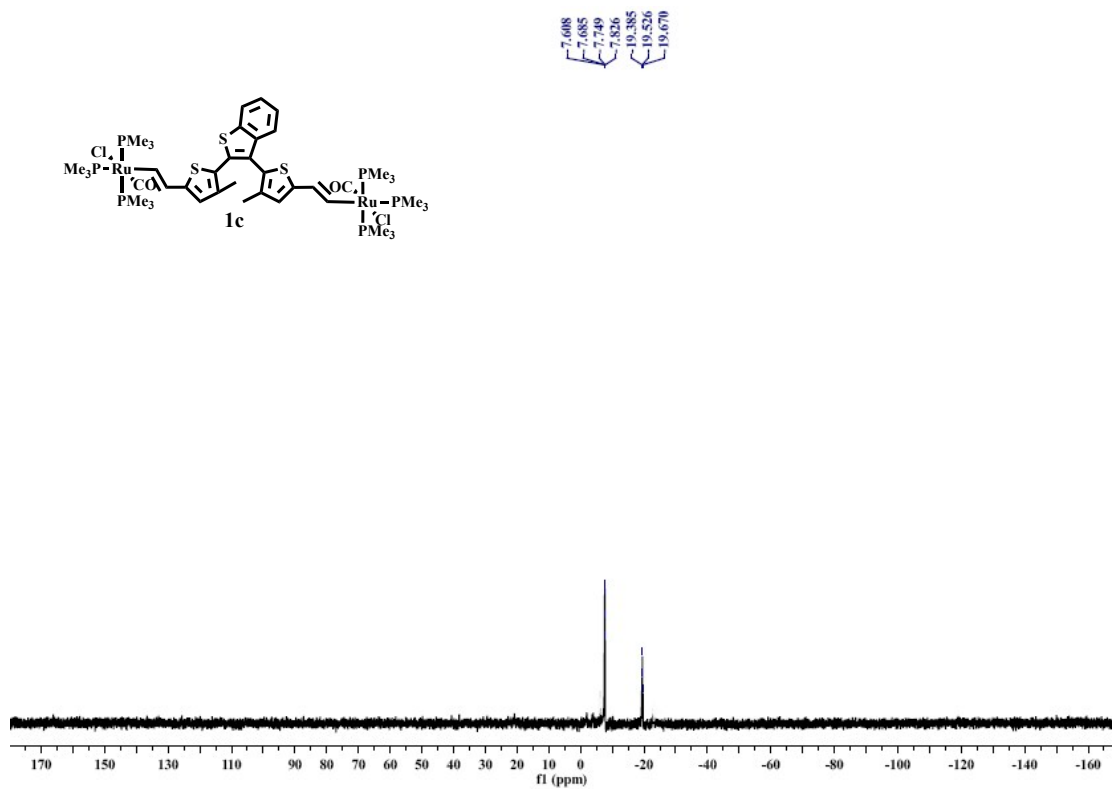

Figure S31.  $^{31}\text{P}$  NMR spectrum (160 MHz,  $\text{CDCl}_3$ ) of **1c**.

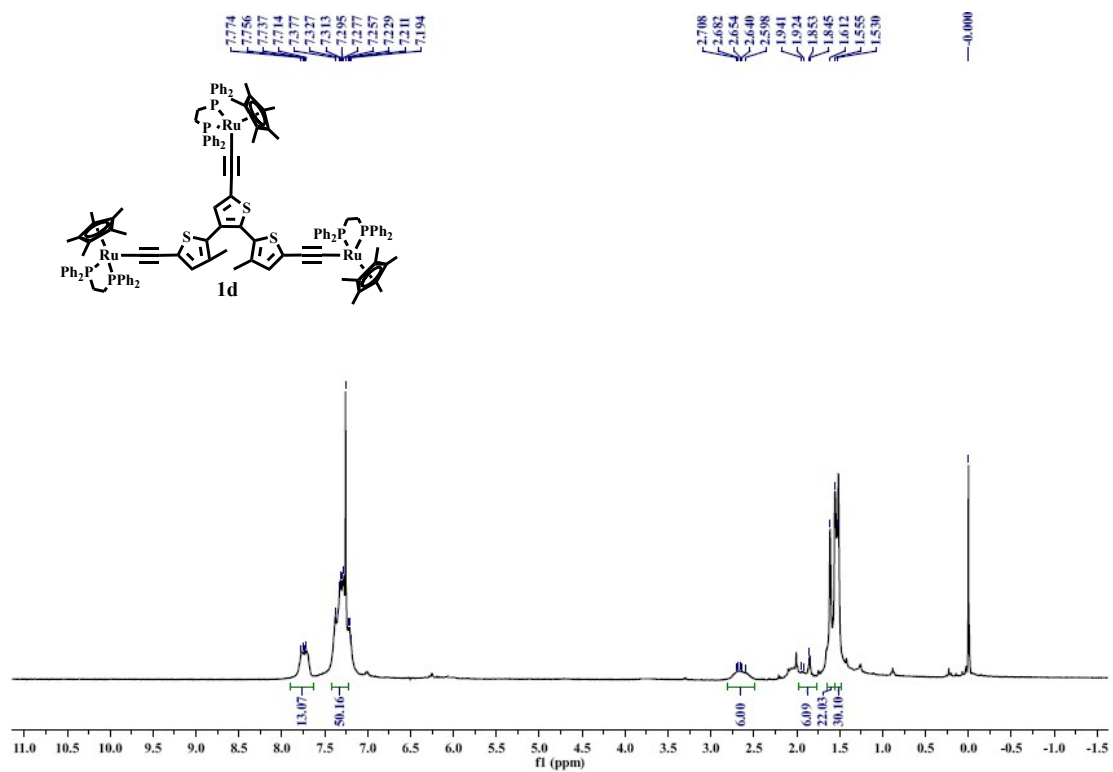

Figure S32.  $^1\text{H}$  NMR spectrum (400 MHz,  $\text{CDCl}_3$ ) of **1d**.

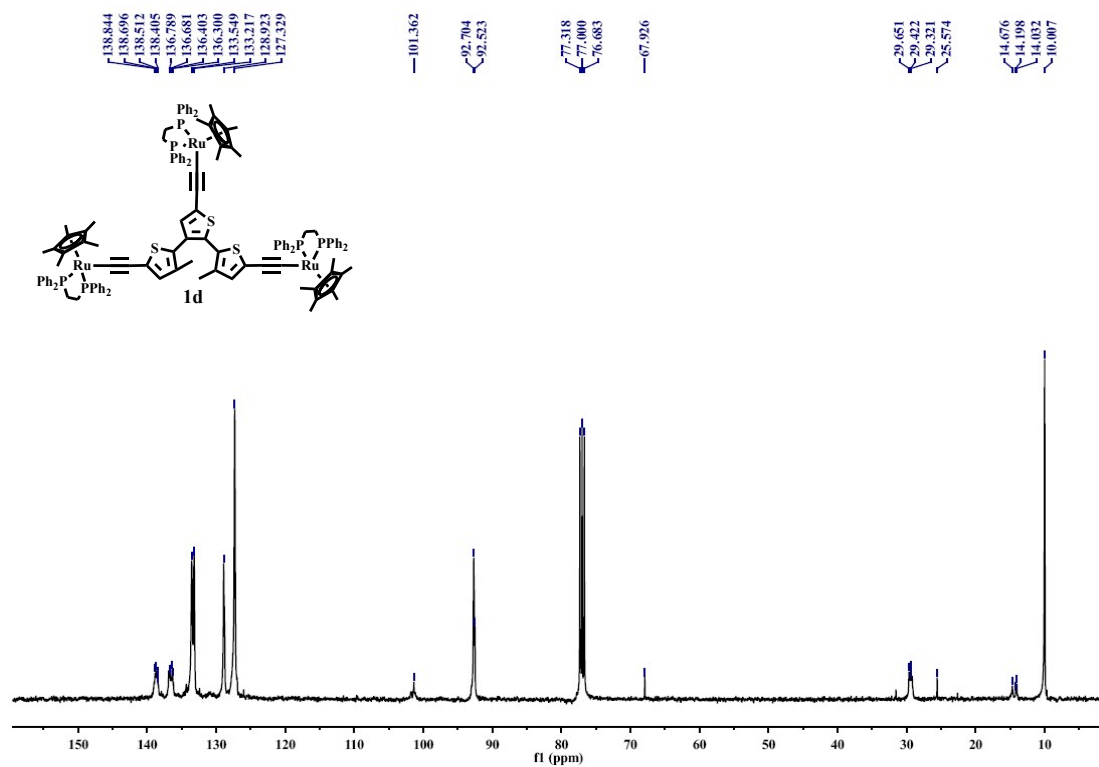

**Figure S33.** <sup>13</sup>C NMR spectrum (100 MHz, CDCl<sub>3</sub>) of **1d**.

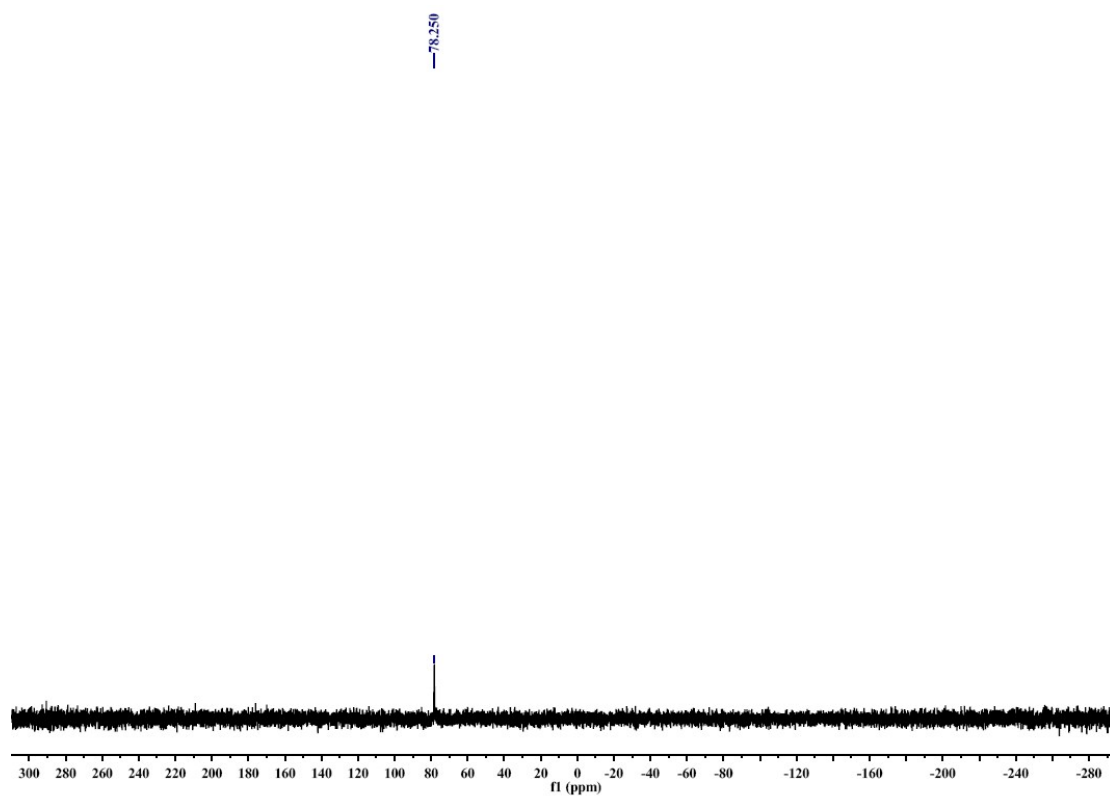

**Figure S34.** <sup>31</sup>P NMR spectrum (160 MHz, CDCl<sub>3</sub>) of **1d**.
